1        **TrkB agonists prevent post-ischemic BDNF-TrkB mediated emergence of**  
2        **refractory neonatal seizures in CD-1 pups.**

3  
4        P.A. Kipnis<sup>1\*</sup>, B.J. Sullivan<sup>1\*</sup>, B.M. Carter<sup>1</sup>, S.D. Kadam<sup>1, 2, 3</sup>

5  
6  
7  
8        **Affiliations:**

9        <sup>1</sup> Neuroscience Laboratory, Hugo Moser Research Institute at Kennedy Krieger; Baltimore, MD  
10       21205

11       <sup>2</sup> Department of Neurology, Johns Hopkins University School of Medicine; Baltimore, MD  
12       21205

13       \*These authors contributed equally

14       <sup>3</sup> Corresponding author

15  
16  
17  
18  
19  
20       **Corresponding author:**

21       Shilpa D. Kadam, PhD

22       Hugo Moser Research Institute at Kennedy Krieger;

23       Department of Neurology, Johns Hopkins University School of Medicine,

24       707 North Broadway, 400H;

25       Baltimore, MD 21205

26       Phone: 443-923-2688

27       Fax: 443-923-2695

28       E-mail: [kadam@kennedykrieger.org](mailto:kadam@kennedykrieger.org)

29       [skadam1@jh.edu](mailto:skadam1@jh.edu)

30  
31  
32  
33

34 **Abstract:**

35           Refractory neonatal seizures do not respond to first-line anti-seizure medications (ASMs)  
36 like phenobarbital (PB), a positive allosteric modulator for GABA<sub>A</sub> receptors, the most widely  
37 used ASM to treat neonatal seizures. GABA<sub>A</sub> receptor-mediated inhibition is dependent upon  
38 neuronal chloride regulation. The electroneutral cation-chloride transporter KCC2 mediates  
39 neuronal chloride extrusion; an age-dependent increase of KCC2 expression enables the shift of  
40 GABAergic signaling from depolarizing to hyperpolarizing. BDNF-TrkB activation following  
41 excitotoxic injury recruits downstream targets like PLC $\gamma$ 1, leading to KCC2 hypofunction. This  
42 study investigated the efficacy of partial and full TrkB agonists; LM22A-4 (LM), HIOC and  
43 Deoxygedunin (DG) respectively, on PB-refractory seizures, post-ischemic TrkB-pathway  
44 activation, and KCC2 membrane stability in a P7 CD-1 mouse model of refractory neonatal  
45 seizures. Anti-seizure efficacy was determined by quantifying seizure burdens with continuous  
46 video-EEG. LM rescued PB-refractory seizures in a sexually dimorphic manner. LM anti-seizure  
47 efficacy was associated with a significant reduction in the post-ischemic phosphorylation of  
48 TrkB at Y816, a site known to mediate post-ischemic KCC2 hypofunction via PLC $\gamma$ 1 activation.  
49 LM additionally rescued ischemia-induced pKCC2-S940 dephosphorylation preserving its  
50 membrane stability. HIOC and DG, two novel full TrkB agonists, also rescued PB-refractoriness  
51 and post-ischemic TrkB-PLC $\gamma$ 1 pathway activation. Additionally, chemogenetic inactivation of  
52 TrkB significantly reduced post-ischemic neonatal seizure burdens at P7. Developmental  
53 expression profiles of TrkB and KCC2 in naïve pups identified developmental differences that  
54 may underlie the sex-dependent variance in anti-seizure efficacy. These results support a novel  
55 role for the TrkB receptor in the emergence of age-dependent refractory neonatal seizures.

56

## 57 **Introduction**

58  
59       Excitotoxic injury has been shown to phosphorylate tyrosine receptor kinase B (TrkB)  
60 pathway signaling (1–3). TrkB is activated by its endogenous ligand, the neurotrophin brain-  
61 derived neurotrophic factor (BDNF), and leads to the activation of multiple intracellular signaling  
62 cascades, including three major downstream signaling cascades: phospholipase C $\gamma$ 1  
63 (PLC $\gamma$ 1)/protein kinase C (PKC), mitogen-activated protein kinase (MAP/ERK kinase) and the  
64 phosphatidylinositol 3-kinase/Akt (4). We have previously demonstrated the post-ischemic  
65 activation of the TrkB-PLC $\gamma$ 1 pathway results in the hypofunction of the K-Cl co-transporter  
66 (KCC2) in a mouse model of acute neonatal ischemia associated with phenobarbital (PB)-  
67 refractory seizures (5).

68       The electroneutral cation-chloride transporter KCC2 is the primary neuronal Cl<sup>-</sup> extruder  
69 and enables hyperpolarizing GABAergic inhibition in the brain. The residue Ser940 (S940) on  
70 the C-terminus of KCC2 is associated with its membrane stability and chloride extrusion  
71 capacity (6, 7). The developmental switch in GABAergic signaling from depolarizing to  
72 hyperpolarizing (8) is enabled by an age-dependent increase of KCC2 expression (9). In the  
73 neonatal period, KCC2 expression is low and GABA is depolarizing (8–10). In addition, KCC2  
74 is susceptible to degradation following excitotoxic injury (2, 11, 12). In our characterized CD-1  
75 mouse model of ischemic neonatal seizures, KCC2 underwent degradation and  
76 dephosphorylation of residue S940 (5). This rendered the ASM PB inefficacious (5), as PB is a  
77 positive allosteric modulator of GABA<sub>A</sub> receptors (13). Prevention of BDNF-TrkB mediated  
78 KCC2 hypofunction rescued PB-refractoriness in CD-1 pups (5). We hypothesized that the  
79 BDNF mimetic LM22A-4 (LM) (14) would interfere with the post-ischemic BDNF-TrkB  
80 signaling underlying the emergence of refractoriness.

81 This study utilized a characterized model of PB-refractory neonatal ischemic seizures at  
82 P7 and PB-responsive ischemic seizures at P10 (2, 5, 15). The efficacy of two graded doses  
83 (0.25mg/kg [LM] and 2.5mg/kg [LM2.5]) of the BDNF loop II mimetic, LM, was compared to  
84 the novel full TrkB agonists HIOC (16) and DG (17). HIOC is an *N*-acetylserotonin (NAS)  
85 derivative that exhibits more robust neurotrophic effects than NAS in a TrkB-dependent manner  
86 (16, 18). DG is a naturally occurring compound in the gedunin family that has shown robust  
87 neuroprotective properties in rats in a TrkB-dependent manner (17). The developmental profile  
88 of TrkB in neonatal brains is shown to decrease with age (19–22) and was also investigated here  
89 in the CD-1 strain. The role of TrkB receptor in neonatal seizure susceptibility was investigated  
90 using a chemogenetic mouse model.

91

## 92 **Materials and Methods**

93

### 94 *Experimental Design*

95 All experiments were done in compliance with the Johns Hopkins University Committee  
96 on the Ethics of Animal Experiments (Permit A3272-01) and approved by the Animal Care and  
97 Use Committee of Johns Hopkins. Litters of CD-1 pups were purchased from Charles River  
98 Laboratories, Inc. (Wilmington, MA). Pups with dams (litter size=10) were delivered on  
99 postnatal day 3 (P3) and were allowed to acclimate. Food and water were provided *ad libitum*.  
100 Doses for LM used in vivo and in vitro were determined from previously described *in vitro*  
101 pharmacokinetics (14). Pups of both sexes at P7 and P10 (see Table S1 for sample sizes) were  
102 intraperitoneally (IP; Fig. 1A) administered 0.25mg/kg LM dissolved in isotonic phosphate-  
103 buffered saline (PBS) as two treatment groups: 1. one dose 2h before ligation (Pre LM), 2.  
104 immediately following ligation (Post LM). After 1h of baseline EEG recording, pups were given

105 a loading dose of PB (25mg/kg, IP). Doses for HIOC used in vivo and in vitro were determined  
106 from previously described in vitro pharmacokinetics (16). Pups of both sexes at P7 were IP  
107 administered the full agonist selective for TrkB 5mg/kg N-[2-(5-hydroxy-1H-indol-3-yl) ethyl]-  
108 2-oxopiperidine-3-carboxamide (HIOC) dissolved in 95/5% isotonic PBS/DMSO as two  
109 treatment groups: 1. one dose 2h before ligation (Pre HIOC), 2. immediately following ligation  
110 (Post HIOC). After 1h of baseline EEG recording, pups were given a loading dose of PB  
111 (25mg/kg, IP). Pups of both sexes at P7 were IP administered 5mg/kg the full agonist selective  
112 for TrkB, deoxygedunin (DG), dissolved in 95/5% isotonic PBS/DMSO as two treatment groups:  
113 1. one dose 2h before ligation (Pre DG), 2. immediately following ligation (Post DG). After 1h  
114 of baseline EEG recording, pups were given a loading dose of PB (25mg/kg, IP). During the  
115 course of the experiments, DG became commercially unavailable, which is reflected for the  
116 smaller sample size for the DG treated groups. Our group has previously published results  
117 showing that the 5% DMSO used as a vehicle for drug administration did not have any anti-  
118 seizure effect and did not alter baseline seizure burdens (2).

119 To run analysis for drug efficacies, data for naïve male and female pups were pooled  
120 across all treatment groups for P7. The Ligate+PB group was pooled from the LM, LM  
121 2.5mg/kg, and HIOC treatment litter mates. Experiments for DG were performed as an additional  
122 positive control and the Ligate+PB group was pooled for LM, LM 2.5mg/kg, and DG treatment  
123 litter mates (see Table S1 for sample size details).

124

### 125 *Surgery Protocol for Carotid Ligation and EEG Electrode Implantation*

126 At P7 or P10, pups underwent permanent unilateral ligation of the right common carotid  
127 artery without transection using 6-0 surgisilk (Fine Science Tools, USA) under isofluorane

128 anesthesia (Henry Schein, USA). The skin was closed with 6-0 monofilament nylon (Covidien)  
129 and lidocaine was applied as a local anesthetic. Pups were then implanted with three subdermal  
130 EEG electrodes (SWE-L25, Ives EEG Solutions, USA): 1 recording and 1 reference overlying  
131 the left/right parietal cortex, and 1 ground overlying the rostrum (15, 23). The electrodes were  
132 fixed in place using cyanoacrylate adhesive (KrazyGlue). Pups were tethered to a preamplifier  
133 inside the recording chamber and allowed to recover from anesthesia. vEEG was recorded  
134 continuously for 2h in a chamber maintained at 37°C with isothermal pads. At the end of  
135 recording, the electrodes were removed and pups were returned to the dam.

136

### 137 *EEG Recordings and Analyses*

138 EEG recordings were acquired using Sirenia Acquisition (v1.6.4, Pinnacle Technology,  
139 Inc., USA) with synchronized video recording. Data were recorded with a 400Hz sampling rate  
140 that had a preamplifier gain of 100, and 0.5-50Hz low-pass filter to remove ambient noise. The  
141 EEG data were then binned into 10s epochs for manual scoring. Seizures were defined as  
142 electrographic events consisting of rhythmic spikes of high amplitude, diffuse peak frequency of  
143  $\geq 7$ -8Hz lasting  $\geq 6$  seconds, similar to previous studies (5, 23). Similarly to previously published  
144 protocols in this model, short-duration burst activity lasting  $< 6$ s was not included in seizure  
145 burden calculations. Seizure suppression was calculated as:

$$146 \frac{2^{\text{nd}} \text{hr seizure burden} - 1^{\text{st}} \text{hr seizure burden}}{1^{\text{st}} \text{hr seizure burden}} * 100$$

147

### 148 *EEG Power Analysis*

149 Four P7 pups of each sex in each treatment group were randomly chosen for EEG power  
150 analysis. EEG power was obtained with Sirenia Sleep (v1.7.10, Pinnacle Technology Inc., USA).

151 EEG spectral power from 0.5-50Hz was acquired for each 10s epoch of recording after  
152 automated fast Fourier transformation. Data from EEG artifacts was excluded from these  
153 analyses. Total EEG power was calculated as follows:

$$154 \quad \frac{1^{\text{st}}\text{hr power} - 2^{\text{nd}}\text{hr power}}{1^{\text{st}}\text{hr power}} * 100$$

155

#### 156 *P7 ligation in C57BL/6 Knockin TrkB<sup>F616A</sup> Pups*

157 *TrkB<sup>F616A</sup>* breeding pairs (JAX stock #022363, developed by the Dr. David Ginty lab,  
158 (24)) were obtained courtesy of Dr. Richard Huganir (Johns Hopkins University). To investigate  
159 the effect of chemogenetically induced deficits in neonatal TrkB signaling in vivo, P7 pups with  
160 *TrkB<sup>F616A</sup>* knockin alleles (F616A<sup>+/+</sup>) (24) received the kinase inhibitor 1NMPP1 from P0 to P7  
161 via transmammary route with the dam receiving the chemogenetic agent in her drinking water  
162 (10% TWEEN-20 and 80uM 1NMPP1 in drinking water). P7 WT<sup>-/-</sup> and F616A<sup>+/+</sup> littermates  
163 with 1NMPP1 treatment underwent unilateral carotid ligation and subsequent qEEG at P7 as  
164 previously described.

165

#### 166 *Western Blotting*

167 24h after ligation all animals were anesthetized with 0.1mL of 90mg/mL chloral hydrate  
168 (IP). Pups were then transcardially perfused with ice cold PBS followed by 1 mL of 1x HALT  
169 protease inhibitor cocktail in PBS (ThermoFisher #78430, USA). The whole brains were  
170 removed, the cerebellum was discarded, and the left and right hemispheres were separated. For  
171 the developmental series, brains were further micro-dissected into cortex, hippocampus, and  
172 deep gray matter and stored at -80°C until further processing. Homogenized brain tissue was  
173 suspended in T-PER cell lysis buffer containing 1x HALT protease inhibitor cocktail. Protein

174 concentration was measured using the Bradford protein assay at 570nm. 25 $\mu$ g of total protein  
175 (60 $\mu$ g for PLC $\gamma$ 1) in 20 $\mu$ L was run on 4-20% tris-glycine gels (ThermoFisher #XP04205BOX,  
176 USA) for 120 minutes at 130V. Gels were transferred overnight at 20V onto nitrocellulose  
177 membranes. Membranes were blocked in Rockland Blocking Buffer for 1h (Rockland #MB-070,  
178 USA). Membranes underwent 6h incubation with primary antibodies: mouse  $\alpha$  KCC2 (1:1000,  
179 Millipore; #07-432), rabbit  $\alpha$  phospho-KCC2(S940) (1:1000 Aviva Systems Biology;  
180 #OAPC00188), mouse  $\alpha$  TrkB (1:1000, BD Biosciences; #610102), rabbit  $\alpha$  phospho-  
181 TrkB(T816) (1:500, Millipore; #ABN1381), mouse  $\alpha$  PLC $\gamma$ 1 (1:1000, Thermo Scientific; #LF-  
182 MA0050), rabbit  $\alpha$  phospho-PLC $\gamma$ 1(T783) (1:1000, Cell Signaling Technology; #2821S), rabbit  
183  $\alpha$  Erk1/2 (1:1000, Cell Signaling Technology; #4695), rabbit  $\alpha$  phospho-Erk1/2 (1:1000, Cell  
184 Signaling Technology; #4377), and mouse  $\alpha$   $\beta$ -actin ( 1:10,000, Li-Cor; 926-42212). Membranes  
185 were then incubated with fluorescent secondary antibodies (1:5000, Li-Cor 926-68020 and 925-  
186 32211, USA; for antibody RRIDs, see Table S2). Blots were visualized on the Odyssey infrared  
187 imaging system 2.1 (Li-Cor Biosciences, USA). Optical density for each protein band was  
188 normalized to  $\beta$ -actin in the same lane.

189

#### 190 *Surface Protein Separation by Ultracentrifugation*

191 1mm coronal slices were obtained from P7 mouse brains and were allowed to recover for  
192 45min at 34 $^{\circ}$ C with oxygenation 95/5% O $_2$ /CO $_2$ . After recovery, slices were incubated with  
193 TrkB agonists LM22A-4 and HIOC at 34 $^{\circ}$ C with oxygenation. Slices were placed in cell lysis  
194 buffer TPER with HALT protease and phosphatase inhibitors and homogenized with sonicator.  
195 After 30min incubation on ice, protein lysates were ultracentrifuged at 70K RPM and  
196 supernatant was collected as cytosolic sample. Pellets were resuspended and ultracentrifuged,



197 with supernatant discarded as wash component. Pellets were resuspended and collected as  
198 membrane component. Membrane and cytosolic components underwent Bradford analysis and  
199 Western blotting for protein quantification.

200

### 201 *Statistical Analyses*

202 All statistical analyses were performed in Prism 7 (Graphpad, USA). Percent seizure  
203 suppression by sex, seizure burdens, ictal events, ictal durations, and protein expression levels  
204 quantified from P5 to P21 were analyzed using two-way ANOVA and post-hoc corrections were  
205 made using Tukey's test. Percent seizure suppression and all western blot data at P7 and P10 for  
206 drug efficacies were analyzed using one-way ANOVA and post-hoc corrections were made using  
207 Sidak's test. For comparisons between ipsi- and contralateral hemispheres within groups at P7  
208 and P10, as well as comparisons of baseline seizure burdens between developmental ages P7 and  
209 P10, two-tailed t-tests were performed. Significance of correlations between percent EEG  
210 spectral power suppression and percent seizure burden suppression across treatment groups were  
211 performed using Spearman's two-tailed nonparametric test. An alpha of  $p < 0.05$  was considered  
212 significant. All data represent the mean  $\pm$  1 standard error of the mean (SEM).

213

## 214 **Results**

215

### 216 *LM rescued neonatal PB-refractory seizures in a sex-dependent manner*

217 Ischemia-induced seizures in P7 CD-1 pups are PB-refractory (15). Previously it has been  
218 shown that ANA12, a novel small-molecule TrkB antagonist, significantly rescued PB-  
219 refractoriness by blocking BDNF-TrkB pathway activation in a dose dependent manner (2, 5).  
220 To evaluate the efficacy of LM22A-4, a small-molecule TrkB partial agonist on rescuing PB-

221 refractoriness, P7 pups were either given LM immediately after ligation (Post LM) or 2h before  
222 ligation (Pre LM) per the experimental paradigm (Fig. 1A). Continuous 2h vEEG/EMG  
223 recordings were used to identify and quantify post-ischemic electrographic seizure burdens (Fig.  
224 1B-D). The seizure burden in the Ligate+PB group remained unchanged following PB  
225 administration, indicating PB-refractoriness. The Post and Pre LM groups both showed  
226 significant rescue of PB-refractoriness (Fig. 1B-E). Clustering of ictal events was noted in the  
227 Ligate+PB raster plot following PB injection (i.e. Ligate+PB 2<sup>nd</sup> h vs. 1<sup>st</sup> h) without overall  
228 reduction in seizure burdens (Fig. 1D). Both the Post and Pre LM groups also showed similar  
229 clustering of ictal events, although this was associated with a concomitant significant reduction  
230 in overall seizure burdens following PB administration (Fig. 1D and E). When quantified as  
231 percent seizure suppression over the 1<sup>st</sup> hour baseline, intervention with LM+PB significantly  
232 increased seizure suppression in P7 seizing pups (Fig 1E), in contrast to intervention with only  
233 PB which failed to show seizure suppression ( $-4.46 \pm 5.34\%$ ).

234 Neonatal seizure susceptibility and ASM efficacy has been shown to be sexually  
235 dimorphic (5, 15, 23, 25, 26), therefore sex as a biological variable was investigated. At P7, both  
236 sexes were PB-refractory. Female pups were significantly responsive to LM intervention in both  
237 the Post and Pre LM groups, whereas male pups only responded in the Pre LM group (Fig. 1F).  
238 Furthermore, percent seizure suppression in female pups was not significantly different between  
239 the Post and Pre LM groups, demonstrating that pre-ischemic LM intervention did not provide  
240 females any additional benefit in the rescue of PB-refractoriness. However, female pups in the  
241 Post LM group showed significantly greater percent seizure suppression than male pups in the  
242 Post LM group, highlighting important sex differences in the efficacy of LM at P7.

243 As previously characterized for the model, neonatal ischemic seizures at P10 were PB-  
244 responsive in both sexes (15) (Fig. 1G, H), supporting a developmental influence on PB-efficacy.  
245 At P10, only the Pre LM group showed significant improvement in PB-efficacy (Fig. 1G). In  
246 contrast to P7, no sexual dimorphism was noted for either the Post or Pre LM treatment groups at  
247 P10 (Fig. 1H), highlighting the role of developmental age in sexual dimorphism. In summary,  
248 LM intervention significantly rescued PB-refractoriness at P7 and improved PB-efficacy at P10.

249

#### 250 *No dose-dependent effect for a graded dose of LM*

251 To evaluate the dose-dependent efficacy of LM, a ten-fold higher dose (0.25 vs.  
252 2.5mg/kg) was evaluated for PB-refractory seizures at P7. The Post LM2.5 group significantly  
253 suppressed PB-refractory seizures by  $42.77 \pm 9.98\%$ , similar to but not significantly better than  
254 the Post LM 0.25mg/kg dose (two-tailed  $t$  test,  $p=0.6375$ ). In contrast, the Pre LM2.5 group  
255 failed to significantly rescue PB-refractory seizures ( $18.15 \pm 16\%$  seizure suppression, Fig. S1A).  
256 In contrast to the 0.25mg/kg dose, there were no significant differences in seizure suppression  
257 between sexes in the Post and Pre LM2.5 groups (Fig. S1B). The significant seizure suppression  
258 in both the Post LM and Post LM 2.5 groups indicated a nonlinear dose-response curve (27).

259 To evaluate the effect of TrkB agonists LM and HIOC on plasma membrane expression  
260 of TrkB and KCC2, naïve P7 mouse pup brain slices were incubated with either 0.75mM or  
261 7.5mM graded doses of LM, or a 1.7mM dose of HIOC. These in vitro doses mimicked the in  
262 vivo doses used to study anti-seizure efficacies (.25mg/kg, 2.5mg/kg, and 5mg/kg respectively).  
263 Incubation of naïve P7 brain slices with the TrkB agonists showed no significant increase in  
264 pTrkB-Y816 and KCC2 expression at the plasma membrane (Fig S1C, D). Similarly the ratio of  
265 pTrkB-Y816 to total TrkB at the membrane failed to show a significant dose-dependent increase

266 with either LM or HIOC (Fig. S1E). The S940/KCC2 ratios at the membrane were also not  
267 significantly modulated by LM or HIOC (Fig. S1F). These in vitro findings indicate that the  
268 rescue of KCC2 expression by LM and HIOC is specific to the post-ischemic activation of the  
269 BDNF-TrkB pathway in seizing pups. In the absence of the ischemic injury, the TrkB agonists  
270 did not significantly modulate either TrkB or KCC2 insertion at the membrane.

271

### 272 *Effect on frequency and duration of neonatal ischemic seizures*

273 To investigate the seizure semiology, seizure burden was evaluated as the total amount of  
274 time spent seizing on EEG. Baseline seizure burdens (i.e.; represented by the seizures during the  
275 1<sup>st</sup> hour of EEG recording) for each treatment group in this study were not significantly different  
276 from each other at P7 (Fig. 2A) and P10 (Fig. 2B). At P7, the Post and Pre LM groups  
277 demonstrated significant reductions in seizure burdens during the 2<sup>nd</sup> hour following PB  
278 administration (Fig. 2A). In contrast, the Ligate+PB group failed to reduce seizure burdens in the  
279 2<sup>nd</sup> hour, demonstrating PB-refractoriness. At P10 for the same ischemic insult, baseline seizure  
280 burdens were significantly lower than at P7 (Fig. 2B vs. 2A), as previously characterized for the  
281 model (2, 5, 15). Both the Post and Pre LM groups showed significant reduction in seizure  
282 burdens following PB administration, similar to the Ligate+PB group.

283 Analysis of the number of ictal events (Fig. 2C and D) in all treatment groups revealed  
284 that the significant seizure suppression (Fig. 1) with LM intervention was driven by significant  
285 reductions in the number of ictal events at both P7 and P10 (Fig. 2C and D). PB-refractoriness in  
286 the Ligate+PB group at P7 was driven by a significant increase in ictal durations (Fig. 2E). In  
287 contrast, ictal durations during the 2<sup>nd</sup> hour in the Post and Pre LM groups were not significantly  
288 different at both P7 and P10 (Fig. 2E and F). P7 female pups in both the Post and Pre LM groups

289 had significantly lower 2<sup>nd</sup> hour seizure burdens than their respective 1<sup>st</sup> hour (Fig. 2G). In  
290 contrast, males only in the Pre LM group had significantly lower 2<sup>nd</sup> hour seizure burdens when  
291 compared to their respective 1<sup>st</sup> hour at P7.

292 At P10, the 1<sup>st</sup> hour seizure burdens for both male and female pups in the Ligate+PB  
293 group had significantly lower 1<sup>st</sup> hour seizure burdens than their respective P7 counterparts (Fig.  
294 2H). In contrast to P7, the P10 Ligate+PB group demonstrated differences between sexes as only  
295 males had significantly lower seizure burdens in the 2<sup>nd</sup> hour than their respective 1<sup>st</sup> hour. The  
296 females in the Post LM group at P10 had significantly lower seizure burdens in the 2<sup>nd</sup> hour than  
297 their respective 1<sup>st</sup> hour, similar to P7. In contrast, both P10 males and females in the Pre LM  
298 group had significantly lower 2<sup>nd</sup> hour seizures burdens than their respective 1<sup>st</sup> hour, similar to  
299 Pre LM at P7. The sex-dependent differences in ictal events and durations at both ages were not  
300 significant (Fig. 2I-L).

301

### 302 *EEG power was not predictive of acute ASM efficacy*

303 EEG power has been used as a proxy to determine seizure burden on acute induced  
304 seizures (28, 29). EEG power suppression was examined to evaluate efficacy of LM intervention  
305 (for example 10min EEG seizure trace see S2A-D). The Ligate+PB group showed similar  
306 percent EEG power suppression to the LM-treated groups (Fig. S2E), which was driven by  
307 reductions in the 2<sup>nd</sup> hour EEG powers in all treatment groups. Therefore, EEG spectral power  
308 evaluated in a subset of LM-treated P7 pups failed to estimate accurate seizure burdens both in  
309 the Ligate+PB and LM-treated groups (Fig. S2F), indicating the unreliability of EEG power to  
310 detect accurate seizure burdens. Overall EEG power diminishes with the occurrence of repeated  
311 ischemic seizures (30). This phenomenon has also been reported for clinical EEGs (31). The

312 correlation between percent EEG power suppression and percent seizure suppression showed  
313 that quantification of EEG power alone could not accurately measure seizure burdens (Fig. S2G),  
314 similar to previous reports (5, 23).

315

### 316 *TrkB inactivation facilitates post-ischemic amelioration of seizure susceptibility at P7*

317 To investigate the role of post-ischemic TrkB-pathway activation at P7 in vivo, TrkB  
318 activation was chemogenetically inhibited by 1NMPP1 from P0-P7 in *C57BL/6 Knockin*  
319 *TrkB<sup>F616A</sup>* (F616A<sup>+/+</sup>) pups. Following unilateral carotid ligation, WT<sup>-/-</sup> pups administered  
320 1NMPP1 showed significantly higher 1<sup>st</sup> h seizure burdens than F616A<sup>+/+</sup> pups administered  
321 1NMPP1 (Fig. 3A-D) demonstrating that the chemogenetic inactivation of TrkB significantly  
322 reduced the post-ischemic seizure susceptibility in P7 neonatal pups. EEG seizure burdens were  
323 significantly lower in the F616A<sup>+/+</sup> pups in the 1<sup>st</sup> h following ischemia. EEG seizure burdens  
324 evaluated by sex, found no sex dependent differences. PB-administration at the end of 1h in WT<sup>-/-</sup>  
325 *C57BL/6* pups (Fig 3D) was efficacious. These results support the established importance of  
326 genetic background on ischemia and seizures as phenotypic severity is strain dependent (32–34).  
327 Specifically, the CD-1 strain shows phenotype severity and emergence of refractory neonatal  
328 seizures with added translational value in comparison to *C57BL/6* strain. Overall, these results  
329 demonstrate that post-ischemic activation of the BDNF-TrkB signaling cascade plays a crucial  
330 role in neonatal seizure susceptibility.

331

### 332 *Post-ischemic TrkB-PLCγ1 pathway activation at P7 was rescued by LM intervention*

333 Ischemic insults are known to induce BDNF-TrkB pathway activation (5, 35), and  
334 phosphorylation of Y816 on TrkB activates the PLCγ1 pathway, which has been implicated both

335 acutely (5) and chronically in epileptogenesis (36). 24h post-ischemia, pups in the Ligate+PB  
336 group showed significant increase of TrkB and pTrkB-Y816 expression ipsi- and contralateral to  
337 ischemic insult (Fig. 4A-C), indicating global TrkB activation in the unilateral model. With the  
338 unilateral ischemia model used in this study, ipsi- vs. contralateral-hemispheric differences in  
339 protein expression were also analyzed. The Post LM group showed attenuated TrkB expression  
340 ipsilateral to ischemic insult (Fig. 4A). The pTrkB-Y816 / TrkB ratio of the Ligate+PB group  
341 was significantly lower ipsilateral to insult (Fig. S3A). The Post and Pre LM groups both  
342 significantly rescued post-ischemic TrkB-pathway activation. The ratios of pTrkB-Y816 to total  
343 TrkB showed no significant differences between treatment groups (Fig. S3A). Post-ischemic  
344 TrkB activation was analyzed by sex, and no significant sex-dependent differences were found.

345 Total PLC $\gamma$ 1 expression was not significantly modulated by ischemic insult or Post and  
346 Pre LM intervention (Fig. 4D and E). In contrast, pPLC $\gamma$ 1-Y783 expression was significantly  
347 higher both ipsi- and contralateral to ischemic insult, which was rescued both in Post LM and Pre  
348 LM groups (Fig. 4D and F). PLC $\gamma$ 1 and pPLC $\gamma$ 1-Y783 expression levels were also significantly  
349 lower ipsilateral to insult (Fig. 4D-F). The ratio of pPLC $\gamma$ 1-Y783 to total PLC $\gamma$ 1 was not  
350 significantly different between treatment groups (Fig. S3B).

351 TrkB pathway activation is also known to activate downstream ERK1/2 signaling (37).  
352 At P7, Pre LM was the most efficacious treatment paradigm in reducing EEG seizure burdens  
353 when quantified as percent seizure suppression (Fig 1E) for both sexes. Therefore, ERK1/2  
354 activation was investigated in the Pre LM group. The TrkB-ERK1/2 pathway was not  
355 significantly activated by ischemic insult and was not influenced by LM intervention. However,  
356 ERK1/2 expression was significantly lower ipsilateral to insult in the Ligate+PB group (Fig. 4G  
357 and H). Furthermore, the Pre LM group showed significant activation of pERK1/2-T202/Y204

358 (Fig 4I). These data indicate the BDNF loop II mimetic differentially activated the TrkB-ERK1/2  
359 pathway while simultaneously blocking ischemia-induced activation of the TrkB-PLC $\gamma$ 1  
360 pathway. The ratio of pERK1/2-T202/Y204 to total ERK1/2 was significantly higher in the Pre  
361 LM group both ipsi- and contralateral to insult (Fig. S3C).

362

### 363 *LM rescued post-ischemic KCC2 and pKCC2-S940 degradation at P7*

364 Post-ischemic TrkB-PLC $\gamma$ 1 pathway activation and seizures lead to ipsilateral KCC2  
365 degradation in this model of unilateral ischemic insult (2, 5). The effect of TrkB-PLC $\gamma$ 1 pathway  
366 activation on KCC2 expression was evaluated 24h post-ischemia in LM intervention groups. The  
367 Post and Pre LM treatment group significantly rescued the ipsilateral KCC2 degradation seen in  
368 the Ligate+PB group (Fig. 4J and K). pKCC2-S940 is associated with KCC2 stability on the  
369 plasma membrane and thus its functionality as a Cl<sup>-</sup> extruder (6). Similar to KCC2, the ipsilateral  
370 pKCC2-S940 dephosphorylation in the Ligate+PB group was significantly rescued in the Post  
371 and Pre LM Groups (Fig. 4L). The ratio of pKCC2-S940 to total KCC2 was not significantly  
372 different between treatment groups (Fig. S3D). In summary, LM intervention rescued post-  
373 ischemic BDNF-TrkB-PLC $\gamma$ 1 pathway activation, thus preventing KCC2 endocytosis and  
374 subsequent hypofunction.

375

### 376 *Post-ischemic TrkB-PLC $\gamma$ 1 pathway activation was not evident in ischemic P10 pups*

377 In contrast to P7 pups, no increase in pTrkB-Y816 expression was detected in any  
378 treatment group at P10 (Fig. S4A-C). The Pre LM group showed significantly higher ratios of  
379 pTrkB-Y816 to TrkB ipsi- and contralateral to insult (Fig. S4D). PLC $\gamma$ 1 expression was not  
380 different between treated and untreated pups, though Post and Pre LM pups showed ipsilateral



381 downregulation of pPLC $\gamma$ 1-Y783 (Fig. S4E-G). Ratios of pPLC $\gamma$ 1-Y784 to total PLC $\gamma$ 1 were not  
382 affected by LM intervention (Fig. S4H). No significant KCC2 degradation was detected in the  
383 Ligate+PB group (Fig. S4I and J) following ischemia, though Post LM pups showed lower  
384 ipsilateral pKCC2-S940 expression (Fig. S4K, L). In summary, LM intervention showed mild  
385 activation of the TrkB pathway, but KCC2 levels were not significantly modulated at P10 when  
386 ischemic seizures were responsive to PB.

387

### 388 *TrkB agonists HIOC and DG rescued refractory ischemic seizures at P7 similar to LM*

389 The efficacy of two full TrkB agonists HIOC (16) and DG (17) was investigated to  
390 determine if the anti-seizure efficacy of LM was TrkB site-specific. At P7, HIOC demonstrated  
391 significant seizure suppression in both the Post and Pre HIOC groups (Fig. 5A) indicating that  
392 LM anti-seizure efficacy was not loop II site-specific. Male pups in the Pre HIOC group  
393 demonstrated significant seizure suppression compared to male Ligate+PB pups, in contrast to  
394 female pups (Fig. 5B). No significant sex differences were noted in the Post HIOC group. The  
395 2<sup>nd</sup> hour seizure burden in the Pre HIOC group was significantly lower than its 1<sup>st</sup> hour baseline  
396 (Fig. 5C), in contrast to the Post HIOC and Ligate+PB groups.

397 To evaluate the role of HIOC effects on TrkB-pathway activation, expression levels of  
398 TrkB, ERK1/2, and KCC2 were examined 24h post-ligation. Similar to LM intervention, both  
399 Post and Pre HIOC groups significantly rescued TrkB-pathway activation (Fig. 5D) and pTrkB-  
400 Y816 activation bilaterally (Fig. 5E). Total ERK1/2 expression was not significantly impacted by  
401 ischemic insult or any HIOC treatment (Fig. 5F) similar to LM intervention (Fig. 4H). In contrast  
402 to Pre LM intervention (Fig. 4I), Post HIOC and Pre HIOC groups did not demonstrate an  
403 increase in pERK1/2-T202/Y204 expression (Fig. 5G). In summary, the differences in LM vs.

404 HIOC-mediated downstream ERK1/2 phosphorylation may depend upon site-specific TrkB  
405 binding.

406 KCC2 expression decreased unilaterally in the ipsilateral ischemic hemisphere in the  
407 Ligate+PB group (Fig. 5H). Both Post HIOC and Pre HIOC groups demonstrated significant  
408 rescue of KCC2 and pKCC2-S940 (Fig. 5I) expression in the ipsilateral hemisphere. In  
409 summary, HIOC and LM had similar effects on TrkB, pTrkB-Y816, KCC2, pKCC2-S940, and  
410 ERK1/2 expression. In contrast to LM, HIOC treatment did not result in activation of the  
411 pERK1/2-T202/Y204 downstream pathway.

412 Treatment of P7 ischemic pups with another full TrkB agonist, DG, also significantly  
413 rescued PB-refractoriness in the Post DG and Pre DG groups (Fig. 5J). Male pups in the Post DG  
414 group had significantly greater seizure suppression than male pups in the Ligate+PB group (Fig.  
415 5J), in contrast to both LM and HIOC treatments. No significant sex differences in seizure  
416 suppression were noted for both full TrkB agonists HIOC and DG. Comparing both of these  
417 TrkB agonists to LM highlights that male and female pups differentially responded to BDNF  
418 loop II mimetics and full TrkB agonists. However, the post-ischemic KCC2 degradation and  
419 TrkB pathway activation was rescued in the Post and Pre DG groups (Fig. 5K, L) similar to  
420 interventions with LM and HIOC. The differential activation of the TrkB-ERK1/2 pathway  
421 downstream of BDNF-TrkB signaling elicited by the BDNF mimetic LM was not detected with  
422 the TrkB agonists HIOC and DG.

423

424 *Differences of developmental profiles of TrkB and PLC $\gamma$ 1 expression in naïve CD-1 pups by sex*

425 At P5, females expressed significantly higher levels of TrkB in the cortex compared to  
426 males (Fig. 6A1, A2 and B). Developmentally, TrkB expression in the cortex of female pups

427 declined significantly from P5 to P21. In contrast, TrkB expression in males did not decline  
428 significantly from P5 to P21. Both female and male pups showed significant decline of pTrkB-  
429 Y816 expression from P5 to P21 (Fig. 6C). In the cortex, ratios of pTrkB-Y816 to total TrkB  
430 were not significantly different by sex or age (Fig. 6D).

431         Similar to the results found in the cortex, TrkB expression in the hippocampi of female  
432 pups declined significantly from P5 to P21, whereas TrkB expression in males did not decline  
433 significantly (Fig. 6E1, E2, and F). pTrkB-Y816 expression also declined significantly in the  
434 hippocampi of female pups from P5 to P21 (Fig. 6G). Ratios of pTrkB-Y816 to total TrkB were  
435 not sexually dimorphic and did not change significantly between ages of P5 to P21 in the  
436 hippocampus (Fig. 6H). In deep gray matter, TrkB expression decreased significantly between  
437 P5 and P21 in females, whereas TrkB expression remained stable and did not decline  
438 significantly in males (Fig. 6I1, I2, and J). pTrkB-Y816 expression decreased significantly in  
439 both females and males from P5 to P21 (Fig. 6I1, I2, and K). However, ratios of pTrkB-Y816 to  
440 total TrkB were not different between sexes sexually dimorphic and did not change significantly  
441 between ages of P5 to P21 in the deep gray matter (Fig. 6L). These results suggest that sexually  
442 dimorphic expression levels of TrkB in the cortex may underlie the sexually dimorphic seizure  
443 susceptibility and rescue of PB-refractoriness with LM (Fig. 1 and 2), as neonatal seizures are  
444 cortical. Furthermore, the attenuation of pTrkB-Y816 from P5 to P21 in both males and females  
445 suggests that TrkB pathway activation decreases with age.

446         At P5, females showed significantly higher PLC $\gamma$ 1 and pPLC $\gamma$ 1-Y783 expression in the  
447 cortex than at P21 (Fig. S5A and B). In contrast, PLC $\gamma$ 1 and pPLC $\gamma$ 1-Y783 expression in males  
448 was not significantly different between age groups. The hippocampus and deep gray matter did  
449 not show significant differences between sexes in PLC $\gamma$ 1 or pPLC $\gamma$ 1-Y783 expression during

450 development (Fig. S5D, E, G, and H). Similarly, ratios of pPLC $\gamma$ 1-Y783 to total PLC $\gamma$ 1 were not  
451 significantly different between sexes during development for all examined brain regions (Fig.  
452 S5C, F, and I).

453

#### 454 *Differences in developmental expression profile of KCC2 in naïve CD-1 pups by sex*

455 Males showed a significant increase in KCC2 expression between P5 and P21, and P7  
456 and P21, whereas females did not (Fig. S5J and K). pKCC2-S940 was not found to be  
457 significantly dephosphorylated in both sexes (Fig. S5J and K). In contrast, only females showed  
458 significantly lower ratios of pKCC2-S940 to total KCC2 in the cortex (Fig. S5L). In the  
459 hippocampus, both males and females did not show a significant change in KCC2 expression  
460 (Fig. S5M and N). pKCC2-S940 expression and ratios of pKCC2-S940 to total KCC2 were not  
461 found to be sexually dimorphic between ages (Fig. S5M-O). In deep gray matter, both females  
462 and males showed significantly lower expression of pKCC2-S940 at P21 (Fig. S5P-R). In  
463 summary, the developmental age-dependent decline in KCC2 expression demonstrated an  
464 opposite trend to TrkB expression during the same developmental period.

465

466

## 467 **Discussion**

468

469 The main findings of this study are: 1. A single-dose of LM, a small-molecule BDNF  
470 loop II mimetic, significantly rescued PB-refractoriness in a mouse model of neonatal seizures.  
471 2. LM was more efficacious in female pups at P7. 3. LM prevented ischemia-induced TrkB-  
472 PLC $\gamma$ 1 pathway activation and subsequent KCC2 degradation while significantly increasing  
473 ERK1/2 phosphorylation. 4. The full TrkB agonists HIOC and DG also rescued PB-  
474 refractoriness and ischemia-induced KCC2 degradation, indicating that the efficacy of LM was

475 not site-dependent. HIOC also prevented TrkB-PLC $\gamma$ 1 pathway activation and KCC2  
476 degradation, however without increasing ERK1/2 phosphorylation. 5. At P10, seizures responded  
477 efficaciously to PB, indicating age-dependent emergence of refractory neonatal seizures (P7 vs.  
478 P10) and were not associated with significant BDNF-TrkB pathway activation. 6. Chemogenetic  
479 inactivation of TrkB receptor in P7 pups resulted in a significant reduction in their post-ischemic  
480 seizure susceptibilities supporting the role of the BDNF-TrkB pathway activation in aggravation  
481 of neonatal seizures. 7. The developmental expression profiles demonstrated a significant decline  
482 in TrkB and PLC $\gamma$ 1 expression driven by female pups, versus a significant increase in KCC2  
483 expression driven by male pups from P5 to P21. 8. Early in development, females showed  
484 significantly higher TrkB expression in the cortex, which may underlie the differences in LM  
485 anti-seizure efficacy by sex.

486

487 *LM, a BDNF loop II mimetic, functioned as a TrkB antagonist for endogenous BDNF following*  
488 *ischemia*

489 The therapeutic potential of neurotrophin-based treatments for neurological diseases is an  
490 active field of preclinical research (38). In contrast to the role of neurotrophins in adulthood, the  
491 role of neurotrophin-based interventions in the developing neonatal brain is only recently  
492 emerging (39, 40). BDNF-TrkB signaling is age-dependent, as BDNF robustly activates TrkB in  
493 the neonatal rodent brain but this interaction is attenuated in the adult rodent brain (41). In  
494 human frontal cortex, BDNF expression may gradually decrease with age (42). Following BDNF  
495 binding, TrkB forms a homodimer and auto-phosphorylates Tyr residues in its intracellular  
496 domain (43). The phosphorylation of the TrkB homodimer residues initiates multiple  
497 downstream signal transduction pathways that affect neuronal survival, synaptogenesis, dendritic

498 structure, and activity-dependent synaptic plasticity in a cell-type specific manner (44–46).  
499 Further, these signaling pathways are dependent upon the time course of BDNF-TrkB activation,  
500 as acute vs. chronic activation of BDNF-TrkB are associated with divergent outcomes (45, 47,  
501 48). The complexity of BDNF function is apparent in its role as a selective regulator of gene  
502 expression via its modulation of RNA-binding proteins, and micro-RNAs [reviewed in (49)].  
503 Additionally, both the human and rodent BDNF gene consist of 9 exons, each with their own  
504 promoters resulting in at least 10 different transcripts [reviewed in (50)]. These alternative *Bdnf*  
505 transcripts undergo unique temporal and spatial modulation that allow different factors, such as  
506 hypoxic response elements, to regulate BDNF signaling in a cell-type and circuit-specific  
507 manner (39, 51). The overexpression of a cleavage resistant precursor of BDNF (proBDNF) has  
508 been demonstrated to reduce KCC2 protein expression via the p75 neurotrophin receptor (52),  
509 further highlighting the complexity of BDNF-TrkB signaling in health and disease.

510         Downstream activation of the TrkB-PLC $\gamma$ 1-pathway has been tied to KCC2 hypofunction  
511 by several studies (11, 12, 53). In an adult model of limbic epilepsy, prevention of PLC $\gamma$ 1-  
512 pathway activation prevented epileptogenesis (54, 55). Further, AAV-*Cre* mediated reduction of  
513 KCC2 in the CA1 and dentate gyrus of the adult mouse hippocampus resulted in some of the  
514 core phenotypes of medial temporal lobe epilepsy, such as spontaneous seizures, gliosis, and  
515 neuronal loss (56). These results from adult mouse models of epilepsy, and the prevalence of  
516 pathogenic KCC2 mutations in human epilepsy (57) support the critical role of KCC2 and  
517 pathways that promote its hypofunction in epilepsy.

518         Previous work in the neonatal brain has demonstrated the importance of preventing  
519 BDNF-TrkB activation following excitotoxic injury when using a small-molecule TrkB  
520 antagonist ANA12 [(5), see schematic Fig 7]. ANA12 prevented the activation of the TrkB-

521 PLC $\gamma$ 1 pathway, reversed post-ischemic KCC2 hypofunction, and rescued P7 PB-refractory  
522 seizures (2, 5). In this same neonatal mouse model, the BDNF loop II mimetic LM also  
523 prevented BDNF-mediated TrkB-PLC $\gamma$ 1 pathway activation and KCC2 hypofunction. In  
524 conjunction with the proposed binding of LM to TrkB (14), and the observation that LM  
525 intervention was efficacious, our data suggest that the presence and subsequent binding of LM to  
526 TrkB also prevents the cascade of endogenous post-ischemic BDNF-TrkB signaling similar to  
527 the TrkB antagonist ANA12. Taken together these data indicate that the BDNF loop II mimetic  
528 LM and TrkB antagonist ANA12 both act as TrkB antagonists to the endogenous BDNF released  
529 in the post-ischemic neonatal brain (2, 5, 15).

#### 530 *TrkB-ERK1/2 pathway modulation by the BDNF loop II mimetic*

531 LM binding to TrkB lead to the activation of the TrkB-ERK1/2 pathway, similar to  
532 previous reports from in vitro studies that peptide mimetics of either loop I, III, or IV of BDNF  
533 can induce AKT and ERK phosphorylation (58, 59). TrkB activation also phosphorylates  
534 residue Y816 on its intracellular domain, which permits recruitment and activation of the PLC $\gamma$ 1  
535 pathway, which activates numerous pathways including the Ca<sup>2+</sup>/calmodulin-dependent kinases  
536 (60, 61). In this study, LM rescued the ischemia-induced phosphorylation of residue Y816 on  
537 TrkB, suggesting that the prevention of the TrkB-PLC $\gamma$ 1 pathway mediated KCC2 degradation  
538 occurred by LM binding to TrkB.

539 It has been shown that the use of HIOC in vivo protected retinas from excitotoxic retinal  
540 degeneration in a TrkB-dependent manner (16). Although both LM and HIOC significantly  
541 rescued PB-refractoriness at P7, HIOC functioned differently than LM as it did not induce  
542 activation of the TrkB-ERK1/2 pathway. These results indicate that TrkB agonists can prevent

543 emergence of refractory seizures by preventing the pathological BDNF-TrkB-PLC $\gamma$ 1 pathway  
544 activation in post-ischemic neonatal brains, thus functionally acting as antagonists.

545         The ERK1/2 and AKT pathways are known to promote neurogenesis through the Ras  
546 signaling cascade (61), which regulates a multitude of processes, including cell migration,  
547 differentiation, proliferation, and transcription (62, 63). Previous literature has demonstrated that  
548 LM promoted cell survival in a model of nonarteritic anterior ischemic optic neuropathy (64).  
549 Supporting these results, the Pre LM group showed a significant increase in pERK1/2-  
550 T202/Y204 expression. Intervention with BDNF loop II mimetic LM was shown to have  
551 beneficial long-term effects in vivo, particularly in rescuing adult post-traumatic cortical  
552 epileptogenesis in a TrkB-dependent manner (65), supporting the findings reported in this study.

553

#### 554 *Evidence for BDNF hyperactivity in neurological disorders*

555         In autism, a severe neurodevelopmental disorder with pathogenesis that occurs during the  
556 neonatal period, the early hyperactivity of BDNF may play an important role as high BDNF  
557 levels have been reported in neonatal blood samples from children with autistic spectrum  
558 disorders (66, 67). Valproic acid (VPA) exposure during pregnancy increases the risk of  
559 congenital malformations and autism (68–70). VPA administration to pregnant rodents during  
560 the 2<sup>nd</sup> week of gestation is a well-investigated model of autism (71). The VPA model of autism  
561 has demonstrated increased BDNF (71), increased neuronal intracellular chloride concentration  
562 (72), and a disruption of the GABA developmental sequence (72, 73). Research utilizing a  
563 preclinical model of Fragile X syndrome, an inherited form of intellectual disability and autism  
564 spectrum disorder, administered LM to neonatal *Fmr1* KO mice and rescued cell type specific



565 cortical developmental alterations (74). These studies suggest that TrkB agonists have a  
566 potential role in neurodevelopmental disorders with high levels of BDNF such as autism.

567 TrkB agonists can differentially activate selective downstream pathways, and TrkB-  
568 PLC $\gamma$ 1 activation is complex. This concept is already evident in recent literature that has shown  
569 evidence of TrkB receptor activation and signaling without dimerization, suggesting that TrkB  
570 can under certain conditions exist and function as a monomeric receptor at the plasma membrane  
571 (75). Moreover, recent studies examining plasma membrane diffusion kinetics have  
572 demonstrated that up to 20% of the Trk family may exist as dimers or oligomers prior to  
573 neurotrophin binding (76), though their function remains a topic of debate (77). These  
574 observations warrant further investigation of the complexities involved in neurotrophin-based  
575 signaling in vivo. One specific example of the in vivo complexity of BDNF-TrkB signaling is in  
576 the superoxide dismutase 1 mouse model of familial ALS (78). In this model, the complete  
577 deletion of TrkB in motor neurons in vivo slowed the progression of the disease and permitted  
578 the maintenance of motor function (78). Another indication of the complexity of BDNF-TrkB  
579 signaling is in vitro studies that have identified that an increase in BDNF renders motor neurons  
580 more susceptible to excitotoxic insults in a TrkB dependent manner, however, not all motor  
581 neurons were protected by blocking TrkB (79).

582

### 583 *Sexually dimorphic developmental profiles of TrkB and KCC2*

584 TrkB signaling is known to be sexually dimorphic in a region-specific manner (80–82).  
585 In BDNF<sup>+/-</sup> mice, greater levels of pTrkB-Y705 activation were shown in the frontal cortex and  
586 striatum of male mice 10-16 weeks of age compared to females. These changes in TrkB  
587 phosphorylation state were accompanied by concomitant increases in ERK1/2

588 phosphorylation(80), suggesting a differential signaling mechanism that was sexually dimorphic.  
589 The developmental expression of KCC2 is also known to increase with age, and this  
590 developmental profile is sex-dependent, with female pups expressing higher levels than male  
591 pups (15, 83, 84). Similarly, rodent models have demonstrated higher female expression of  
592 KCC2 mRNA compared to age-matched males in the substantia nigra and mediobasal  
593 hypothalamus (83, 85).

594

### 595 *Conclusion*

596 The findings reported here demonstrate that the BDNF loop II mimetic LM and full TrkB  
597 agonists HIOC and DG, significantly rescued PB-refractoriness and prevented post-ischemic  
598 degradation of KCC2. Sex-dependent differences in developmental profiles for TrkB and KCC2  
599 were identified that may underlie the significant sex-dependent variance in efficacy noted for  
600 LM and the full TrkB agonists. Additionally, the TrkB receptor plays a unique role in post-  
601 ischemic seizure susceptibility in the neonatal brain as shown using chemogenetic techniques. In  
602 summary, results of this study and previous results from a small-molecule TrkB antagonist  
603 ANA12 (2, 5) indicate that refractory seizures following neonatal ischemia can be rescued  
604 acutely by both by TrkB antagonists and agonists. These findings indicate that under neonatal  
605 ischemic conditions, the TrkB agonists investigated here pharmacologically acted similar to  
606 TrkB antagonists by preventing cascades associated with the endogenous BDNF-TrkB pathway  
607 activation, providing novel insights into post-ischemic pathophysiology in immature brains. This  
608 highlights the crucial role of the TrkB receptor in neonatal seizure susceptibility and emergence  
609 of refractory seizures.

610

611 **References and Notes**

- 612 1. R. Aloyz, J. P. Fawcett, D. R. Kaplan, R. A. Murphy, F. D. Miller, Activity-Dependent Activation of TrkB  
613 Neurotrophin Receptors in the Adult CNS. *Learn. Mem.* **6**, 216–231 (1999).
- 614 2. S. K. Kang, M. V. Johnston, S. D. Kadam, Acute TrkB inhibition rescues phenobarbital-resistant seizures in a  
615 mouse model of neonatal ischemia. *Eur J Neurosci.* **42**, 2792–2804 (2015).
- 616 3. X.-P. He, L. Minichiello, R. Klein, J. O. McNamara, Immunohistochemical Evidence of Seizure-Induced  
617 Activation of trkB Receptors in the Mossy Fiber Pathway of Adult Mouse Hippocampus. *J. Neurosci.* **22**,  
618 7502–7508 (2002).
- 619 4. P. Kowiański, G. Lietzau, E. Czuba, M. Waśkow, A. Steliga, J. Moryś, BDNF: A Key Factor with  
620 Multipotent Impact on Brain Signaling and Synaptic Plasticity. *Cell Mol Neurobiol.* **38**, 579–593 (2018).
- 621 5. B. M. Carter, B. J. Sullivan, J. R. Landers, S. D. Kadam, Dose-dependent reversal of KCC2 hypofunction and  
622 phenobarbital-resistant neonatal seizures by ANA12. *Scientific Reports.* **8**, 11987 (2018).
- 623 6. H. H. C. Lee, J. A. Walker, J. R. Williams, R. J. Goodier, J. A. Payne, S. J. Moss, Direct Protein Kinase C-  
624 dependent Phosphorylation Regulates the Cell Surface Stability and Activity of the Potassium Chloride  
625 Cotransporter KCC2. *J. Biol. Chem.* **282**, 29777–29784 (2007).
- 626 7. H. H. Lee, T. Z. Deeb, J. A. Walker, P. A. Davies, S. J. Moss, NMDA receptor activity downregulates KCC2  
627 resulting in depolarizing GABA(A) receptor mediated currents. *Nature neuroscience.* **14**, 736–743 (2011).
- 628 8. Y. Ben-Ari, I. Khalilov, K. T. Kahle, E. Cherubini, The GABA Excitatory/Inhibitory Shift in Brain  
629 Maturation and Neurological Disorders. *The Neuroscientist.* **18**, 467–486 (2012).
- 630 9. G. Sedmak, N. Jovanov-Milošević, M. Puskarjov, M. Ulamec, B. Krušlin, K. Kaila, M. Judaš, Developmental  
631 Expression Patterns of KCC2 and Functionally Associated Molecules in the Human Brain. *Cereb Cortex.* **26**,  
632 4574–4589 (2016).
- 633 10. T. M. Hyde, B. K. Lipska, T. Ali, S. V. Mathew, A. J. Law, O. E. Metitiri, R. E. Straub, T. Ye, C. Colantuoni,  
634 M. M. Herman, L. B. Bigelow, D. R. Weinberger, J. E. Kleinman, Expression of GABA Signaling Molecules  
635 KCC2, NKCC1, and GAD1 in Cortical Development and Schizophrenia. *J. Neurosci.* **31**, 11088–11095  
636 (2011).
- 637 11. C. Rivera, H. Li, J. Thomas-Crusells, H. Lahtinen, T. Viitanen, A. Nanobashvili, Z. Kokaia, M. S. Airaksinen,  
638 J. Voipio, K. Kaila, M. Saarma, BDNF-induced TrkB activation down-regulates the K<sup>+</sup>-Cl<sup>-</sup> cotransporter  
639 KCC2 and impairs neuronal Cl<sup>-</sup> extrusion. *J Cell Biol.* **159**, 747–752 (2002).
- 640 12. C. Rivera, J. Voipio, J. Thomas-Crusells, H. Li, Z. Emri, S. Sipilä, J. A. Payne, L. Minichiello, M. Saarma, K.  
641 Kaila, Mechanism of Activity-Dependent Downregulation of the Neuron-Specific K-Cl Cotransporter KCC2.  
642 *J. Neurosci.* **24**, 4683–4691 (2004).
- 643 13. W. Löscher, M. A. Rogawski, How theories evolved concerning the mechanism of action of barbiturates.  
644 *Epilepsia.* **53**, 12–25 (2012).
- 645 14. S. M. Massa, T. Yang, Y. Xie, J. Shi, M. Bilgen, J. N. Joyce, D. Nehama, J. Rajadas, F. M. Longo, Small  
646 molecule BDNF mimetics activate TrkB signaling and prevent neuronal degeneration in rodents. *J Clin Invest.*  
647 **120**, 1774–1785 (2010).
- 648 15. S. K. Kang, G. J. Markowitz, S. T. Kim, M. V. Johnston, S. D. Kadam, Age- and sex-dependent susceptibility  
649 to phenobarbital-resistant neonatal seizures: role of chloride co-transporters. *Frontiers in Cellular*  
650 *Neuroscience.* **9**, 173 (2015).

- 651 16. J. Shen, K. Ghai, P. Sompol, X. Liu, X. Cao, P. M. Iuvone, K. Ye, N-acetyl serotonin derivatives as potent  
652 neuroprotectants for retinas. *Proc Natl Acad Sci U S A.* **109**, 3540–3545 (2012).
- 653 17. S.-W. Jang, X. Liu, C. B. Chan, S. A. France, I. Sayeed, W. Tang, X. Lin, G. Xiao, R. Andero, Q. Chang, K.  
654 J. Ressler, K. Ye, Deoxygedunin, a Natural Product with Potent Neurotrophic Activity in Mice. *PLoS ONE.* **5**,  
655 e11528 (2010).
- 656 18. N. A. Setterholm, F. E. McDonald, J. H. Boatright, P. M. Iuvone, Gram-scale, chemoselective synthesis of N-  
657 [2-(5-hydroxy-1H-indol-3-yl)ethyl]-2-oxopiperidine-3-carboxamide (HIOC). *Tetrahedron Lett.* **56**, 3413–  
658 3415 (2015).
- 659 19. S. D. Croll, N. Y. Ip, R. M. Lindsay, S. J. Wiegand, Expression of BDNF and trkB as a function of age and  
660 cognitive performance. *Brain Res.* **812**, 200–208 (1998).
- 661 20. F. Rage, M. Silhol, F. Binamé, S. Arancibia, L. Tapia-Arancibia, Effect of aging on the expression of BDNF  
662 and TrkB isoforms in rat pituitary. *Neurobiol. Aging.* **28**, 1088–1098 (2007).
- 663 21. M. Silhol, V. Bonnichon, F. Rage, L. Tapia-Arancibia, Age-related changes in brain-derived neurotrophic  
664 factor and tyrosine kinase receptor isoforms in the hippocampus and hypothalamus in male rats.  
665 *Neuroscience.* **132**, 613–624 (2005).
- 666 22. M. J. Webster, M. M. Herman, J. E. Kleinman, C. Shannon Weickert, BDNF and trkB mRNA expression in  
667 the hippocampus and temporal cortex during the human lifespan. *Gene Expr. Patterns.* **6**, 941–951 (2006).
- 668 23. S. C. Kharod, B. M. Carter, S. D. Kadam, Pharmaco-resistant Neonatal Seizures: Critical Mechanistic Insights  
669 from a Chemoconvulsant Model. *Dev Neurobiol.* **78**, 1117–1130 (2018).
- 670 24. X. Chen, H. Ye, R. Kuruvilla, N. Ramanan, K. W. Scangos, C. Zhang, N. M. Johnson, P. M. England, K. M.  
671 Shokat, D. D. Ginty, A chemical-genetic approach to studying neurotrophin signaling. *Neuron.* **46**, 13–21  
672 (2005).
- 673 25. P. A. Kipnis, B. J. Sullivan, S. D. Kadam, Sex-Dependent Signaling Pathways Underlying Seizure  
674 Susceptibility and the Role of Chloride Cotransporters. *Cells.* **8**, 448 (2019).
- 675 26. A. S. Galanopoulou, Dissociated Gender-Specific Effects of Recurrent Seizures on GABA Signaling in CA1  
676 Pyramidal Neurons: Role of GABAA Receptors. *J. Neurosci.* **28**, 1557–1567 (2008).
- 677 27. E. J. Calabrese, L. A. Baldwin, U-shaped dose-responses in biology, toxicology, and public health. *Annu Rev*  
678 *Public Health.* **22**, 15–33 (2001).
- 679 28. V. I. Dzhalala, D. M. Talos, D. A. Sdrulla, A. C. Brumback, G. C. Mathews, T. A. Benke, E. Delpire, F. E.  
680 Jensen, K. J. Staley, NKCC1 transporter facilitates seizures in the developing brain. *Nature Medicine.* **11**,  
681 1205 (2005).
- 682 29. S. M. Sato, C. S. Woolley, Acute inhibition of neurosteroid estrogen synthesis suppresses status epilepticus in  
683 an animal model. *Elife.* **5** (2016), doi:10.7554/eLife.12917.
- 684 30. A. Zayachkivsky, M. J. Lehmkuhle, J. J. Ekstrand, F. E. Dudek, Ischemic injury suppresses hypoxia-induced  
685 electrographic seizures and the background EEG in a rat model of perinatal hypoxic-ischemic encephalopathy.  
686 *J. Neurophysiol.* **114**, 2753–2763 (2015).
- 687 31. J. M. Rennie, L. S. de Vries, M. Blennow, A. Foran, D. K. Shah, V. Livingstone, A. C. van Huffelen, S. R.  
688 Mathieson, E. Pavlidis, L. C. Weeke, M. C. Toet, M. FINDER, R. M. Pinnamaneni, D. M. Murray, A. C. Ryan,  
689 W. P. Marnane, G. B. Boylan, Characterisation of neonatal seizures and their treatment using continuous EEG

- 690 monitoring: a multicentre experience. *Arch. Dis. Child. Fetal Neonatal Ed.* (2018), doi:10.1136/archdischild-  
691 2018-315624.
- 692 32. R. A. Sheldon, C. Sedik, D. M. Ferriero, Strain-related brain injury in neonatal mice subjected to hypoxia-  
693 ischemia. *Brain Research.* **810**, 114–122 (1998).
- 694 33. R. A. Sheldon, C. Windsor, D. M. Ferriero, Strain-Related Differences in Mouse Neonatal Hypoxia-Ischemia.  
695 *Dev. Neurosci.*, 1–7 (2019).
- 696 34. S. K. Kang, N. A. Hawkins, J. A. Kearney, C57BL/6J and C57BL/6N substrains differentially influence  
697 phenotype severity in the *Scn1a*<sup>+/-</sup> mouse model of Dravet syndrome. *Epilepsia Open.* **4**, 164–169 (2019).
- 698 35. P. B. de la Tremblaye, S. M. Benoit, S. Schock, H. Plamondon, CRHR1 exacerbates the glial inflammatory  
699 response and alters BDNF/TrkB/pCREB signaling in a rat model of global cerebral ischemia: implications for  
700 neuroprotection and cognitive recovery. *Progress in Neuro-Psychopharmacology and Biological Psychiatry.*  
701 **79**, 234–248 (2017).
- 702 36. X. P. He, E. Pan, C. Sciarretta, L. Minichiello, J. O. McNamara, Disruption of TrkB-Mediated Phospholipase  
703 C Signaling Inhibits Limbic Epileptogenesis. *Journal of Neuroscience.* **30**, 6188–6196 (2010).
- 704 37. R. D. Almeida, B. J. Manadas, C. V. Melo, J. R. Gomes, C. S. Mendes, M. M. Grãos, R. F. Carvalho, A. P.  
705 Carvalho, C. B. Duarte, Neuroprotection by BDNF against glutamate-induced apoptotic cell death is mediated  
706 by ERK and PI3-kinase pathways. *Cell Death and Differentiation.* **12**, 1329–1343 (2005).
- 707 38. F. M. Longo, S. M. Massa, Small-molecule modulation of neurotrophin receptors: a strategy for the treatment  
708 of neurological disease. *Nature Reviews Drug Discovery.* **12**, 507–525 (2013).
- 709 39. B. L. Hempstead, Brain-Derived Neurotrophic Factor: Three Ligands, Many Actions. *Trans. Am. Clin.*  
710 *Climatol. Assoc.* **126**, 9–19 (2015).
- 711 40. L. Subedi, H. Huang, A. Pant, P. M. Westgate, H. S. Bada, J. A. Bauer, P. J. Giannone, T. Sithisarn, Plasma  
712 Brain-Derived Neurotrophic Factor Levels in Newborn Infants with Neonatal Abstinence Syndrome. *Front.*  
713 *Pediatr.* **5** (2017), doi:10.3389/fped.2017.00238.
- 714 41. B. Knusel, S. J. Rabin, F. Hefti, D. R. Kaplan, Regulated neurotrophin receptor responsiveness during  
715 neuronal migration and early differentiation. *J. Neurosci.* **14**, 1542–1554 (1994).
- 716 42. H. Oh, D. A. Lewis, E. Sibille, The Role of BDNF in Age-Dependent Changes of Excitatory and Inhibitory  
717 Synaptic Markers in the Human Prefrontal Cortex. *Neuropsychopharmacology.* **41**, 3080–3091 (2016).
- 718 43. K. Deinhardt, M. V. Chao, Trk receptors. *Handb Exp Pharmacol.* **220**, 103–119 (2014).
- 719 44. M. V. Chao, Neurotrophins and their receptors: a convergence point for many signalling pathways. *Nat. Rev.*  
720 *Neurosci.* **4**, 299–309 (2003).
- 721 45. K. Gottmann, T. Mittmann, V. Lessmann, BDNF signaling in the formation, maturation and plasticity of  
722 glutamatergic and GABAergic synapses. *Exp Brain Res.* **199**, 203–234 (2009).
- 723 46. E. J. Huang, L. F. Reichardt, Trk receptors: roles in neuronal signal transduction. *Annu Rev Biochem.* **72**, 609–  
724 642 (2003).
- 725 47. D. K. Binder, S. D. Croll, C. M. Gall, H. E. Scharfman, BDNF and epilepsy: too much of a good thing?  
726 *Trends in Neurosciences.* **24**, 47–53 (2001).

- 727 48. J. O. McNamara, H. E. Scharfman, in *Jasper's Basic Mechanisms of the Epilepsies*, J. L. Noebels, M. Avoli,  
728 M. A. Rogawski, R. W. Olsen, A. V. Delgado-Escueta, Eds. (National Center for Biotechnology Information  
729 (US), Bethesda (MD), ed. 4th, 2012; <http://www.ncbi.nlm.nih.gov/books/NBK98186/>).
- 730 49. C. R. Ruiz, J. Shi, M. K. Meffert, Transcript specificity in BDNF-regulated protein synthesis.  
731 *Neuropharmacology*. **76 Pt C**, 657–663 (2014).
- 732 50. K.-W. Chen, L. Chen, Epigenetic Regulation of BDNF Gene during Development and Diseases. *Int J Mol Sci*.  
733 **18** (2017), doi:10.3390/ijms18030571.
- 734 51. K. R. Maynard, J. L. Hill, N. E. Calcaterra, M. E. Palko, A. Kardian, D. Paredes, M. Sukumar, B. D. Adler, D.  
735 V. Jimenez, R. J. Schloesser, L. Tessarollo, B. Lu, K. Martinowich, Functional Role of BDNF Production  
736 from Unique Promoters in Aggression and Serotonin Signaling. *Neuropsychopharmacology*. **41**, 1943–1955  
737 (2016).
- 738 52. B. Riffault, N. Kourdougli, C. Dumon, N. Ferrand, E. Buhler, F. Schaller, C. Chambon, C. Rivera, J.-L.  
739 Gaiarsa, C. Porcher, Pro-Brain-Derived Neurotrophic Factor (proBDNF)-Mediated p75NTR Activation  
740 Promotes Depolarizing Actions of GABA and Increases Susceptibility to Epileptic Seizures. *Cereb Cortex*.  
741 **28**, 510–527 (2018).
- 742 53. R. Nardou, S. Yamamoto, G. Chazal, A. Bhar, N. Ferrand, O. Dulac, Y. Ben-Ari, I. Khalilov, Neuronal  
743 chloride accumulation and excitatory GABA underlie aggravation of neonatal epileptiform activities by  
744 phenobarbital. *Brain*. **134**, 987–1002 (2011).
- 745 54. B. Gu, Y. Z. Huang, X.-P. He, R. B. Joshi, W. Jang, J. O. McNamara, A Peptide Uncoupling BDNF Receptor  
746 TrkB from Phospholipase C $\gamma$ 1 Prevents Epilepsy Induced by Status Epilepticus. *Neuron*. **88**, 484–491 (2015).
- 747 55. X. P. He, E. Pan, C. Sciarretta, L. Minichiello, J. O. McNamara, Disruption of TrkB-mediated PLC $\beta$   
748 signaling inhibits limbic epileptogenesis. *J Neurosci*. **30**, 6188–6196 (2010).
- 749 56. M. R. Kelley, R. A. Cardarelli, J. L. Smalley, T. A. Ollerhead, P. M. Andrew, N. J. Brandon, T. Z. Deeb, S. J.  
750 Moss, Locally Reducing KCC2 Activity in the Hippocampus is Sufficient to Induce Temporal Lobe Epilepsy.  
751 *EBioMedicine* (2018), doi:10.1016/j.ebiom.2018.05.029.
- 752 57. P. Q. Duy, W. B. David, K. T. Kahle, Identification of KCC2 Mutations in Human Epilepsy Suggests  
753 Strategies for Therapeutic Transporter Modulation. *Front. Cell. Neurosci*. **13** (2019),  
754 doi:10.3389/fncel.2019.00515.
- 755 58. K. Fobian, S. Owczarek, C. Budtz, E. Bock, V. Berezin, M. V. Pedersen, Peptides derived from the solvent-  
756 exposed loops 3 and 4 of BDNF bind TrkB and p75NTR receptors and stimulate neurite outgrowth and  
757 survival. *Journal of Neuroscience Research*. **88**, 1170–1181 (2010).
- 758 59. T. A. Gudasheva, P. Povarnina, I. O. Logvinov, T. A. Antipova, S. B. Seredenin, Mimetics of brain-derived  
759 neurotrophic factor loops 1 and 4 are active in a model of ischemic stroke in rats. *Drug Des Devel Ther*. **10**,  
760 3545–3553 (2016).
- 761 60. A. Gärtner, D. G. Polnau, V. Staiger, C. Sciarretta, L. Minichiello, H. Thoenen, T. Bonhoeffer, M. Korte,  
762 Hippocampal long-term potentiation is supported by presynaptic and postsynaptic tyrosine receptor kinase B-  
763 mediated phospholipase C $\gamma$  signaling. *J. Neurosci*. **26**, 3496–3504 (2006).
- 764 61. L. Minichiello, TrkB signalling pathways in LTP and learning. *Nat. Rev. Neurosci*. **10**, 850–860 (2009).
- 765 62. B. H. Han, D. M. Holtzman, BDNF Protects the Neonatal Brain from Hypoxic-Ischemic Injury In Vivo via the  
766 ERK Pathway. *The Journal of Neuroscience*. **20**, 5775–5781 (2000).

- 767 63. R. Roskoski, ERK1/2 MAP kinases: structure, function, and regulation. *Pharmacol. Res.* **66**, 105–143 (2012).
- 768 64. M. Ali Shariati, V. Kumar, T. Yang, C. Chakraborty, B. A. Barres, F. M. Longo, Y. J. Liao, A Small  
769 Molecule TrkB Neurotrophin Receptor Partial Agonist as Possible Treatment for Experimental Nonarteritic  
770 Anterior Ischemic Optic Neuropathy. *Curr. Eye Res.* **43**, 1489–1499 (2018).
- 771 65. F. Gu, I. Parada, T. Yang, F. M. Longo, D. A. Prince, Partial TrkB receptor activation suppresses cortical  
772 epileptogenesis through actions on parvalbumin interneurons. *Neurobiology of Disease.* **113**, 45–58 (2018).
- 773 66. K. B. Nelson, J. K. Grether, L. A. Croen, J. M. Dambrosia, B. F. Dickens, L. L. Jelliffe, R. L. Hansen, T. M.  
774 Phillips, Neuropeptides and neurotrophins in neonatal blood of children with autism or mental retardation.  
775 *Annals of Neurology.* **49**, 597–606 (2001).
- 776 67. S.-J. Tsai, Is autism caused by early hyperactivity of brain-derived neurotrophic factor? *Medical Hypotheses.*  
777 **65**, 79–82 (2005).
- 778 68. R. L. Bromley, G. Mawer, J. Clayton-Smith, G. A. Baker, Liverpool and Manchester Neurodevelopment  
779 Group, Autism spectrum disorders following in utero exposure to antiepileptic drugs. *Neurology.* **71**, 1923–  
780 1924 (2008).
- 781 69. R. L. Bromley, G. E. Mawer, M. Briggs, C. Cheyne, J. Clayton-Smith, M. García-Fiñana, R. Kneen, S. B.  
782 Lucas, R. Shallcross, G. A. Baker, Liverpool and Manchester Neurodevelopment Group, The prevalence of  
783 neurodevelopmental disorders in children prenatally exposed to antiepileptic drugs. *J. Neurol. Neurosurg.*  
784 *Psychiatry.* **84**, 637–643 (2013).
- 785 70. G. Williams, J. King, M. Cunningham, M. Stephan, B. Kerr, J. H. Hersh, Fetal valproate syndrome and  
786 autism: additional evidence of an association. *Dev Med Child Neurol.* **43**, 202–206 (2001).
- 787 71. L. E. F. Almeida, C. D. Roby, B. K. Krueger, Increased BDNF expression in fetal brain in the valproic acid  
788 model of autism. *Molecular and Cellular Neuroscience.* **59**, 57–62 (2014).
- 789 72. R. Tyzio, R. Nardou, D. C. Ferrari, T. Tsintsadze, A. Shahrokhi, S. Eftekhari, I. Khalilov, V. Tsintsadze, C.  
790 Brouchoud, G. Chazal, E. Lemonnier, N. Lozovaya, N. Burnashev, Y. Ben-Ari, Oxytocin-mediated GABA  
791 inhibition during delivery attenuates autism pathogenesis in rodent offspring. *Science.* **343**, 675–679 (2014).
- 792 73. R. Cloarec, B. Riffault, A. Dufour, H. Rabiei, L.-A. Gouty-Colomer, C. Dumon, D. Guimond, P. Bonifazi, S.  
793 Eftekhari, N. Lozovaya, D. C. Ferrari, Y. Ben-Ari, Pyramidal neuron growth and increased hippocampal  
794 volume during labor and birth in autism. *Science Advances.* **5**, eaav0394 (2019).
- 795 74. T. Nomura, T. F. Musial, J. J. Marshall, Y. Zhu, C. L. Remmers, J. Xu, D. A. Nicholson, A. Contractor,  
796 Delayed Maturation of Fast-Spiking Interneurons Is Rectified by Activation of the TrkB Receptor in the  
797 Mouse Model of Fragile X Syndrome. *J. Neurosci.* **37**, 11298–11310 (2017).
- 798 75. E. E. Zahavi, N. Steinberg, T. Altman, M. Chein, Y. Joshi, T. Gradus-Pery, E. Perlson, The receptor tyrosine  
799 kinase TrkB signals without dimerization at the plasma membrane. *Sci. Signal.* **11**, eaao4006 (2018).
- 800 76. L. Marchetti, A. Callegari, S. Luin, G. Signore, A. Viegi, F. Beltram, A. Cattaneo, Ligand signature in the  
801 membrane dynamics of single TrkA receptor molecules. *J. Cell. Sci.* **126**, 4445–4456 (2013).
- 802 77. I. N. Maruyama, Mechanisms of Activation of Receptor Tyrosine Kinases: Monomers or Dimers. *Cells.* **3**,  
803 304–330 (2014).
- 804 78. J. Zhai, W. Zhou, J. Li, C. R. Hayworth, L. Zhang, H. Misawa, R. Klein, S. S. Scherer, R. J. Balice-Gordon,  
805 R. G. Kalb, The in vivo contribution of motor neuron TrkB receptors to mutant SOD1 motor neuron disease.  
806 *Hum Mol Genet.* **20**, 4116–4131 (2011).

- 807 79. P. Hu, R. G. Kalb, BDNF heightens the sensitivity of motor neurons to excitotoxic insults through activation  
808 of TrkB. *Journal of Neurochemistry*. **84**, 1421–1430 (2003).
- 809 80. R. A. Hill, M. van den Buuse, Sex-dependent and region-specific changes in TrkB signaling in BDNF  
810 heterozygous mice. *Brain Res*. **1384**, 51–60 (2011).
- 811 81. H. E. Scharfman, N. J. MacLusky, Differential regulation of BDNF, synaptic plasticity and sprouting in the  
812 hippocampal mossy fiber pathway of male and female rats. *Neuropharmacology*. **76** (2014),  
813 doi:10.1016/j.neuropharm.2013.04.029.
- 814 82. H. E. Scharfman, N. J. Maclusky, Similarities between actions of estrogen and BDNF in the hippocampus:  
815 coincidence or clue? *Trends Neurosci*. **28**, 79–85 (2005).
- 816 83. A. S. Galanopoulou, A. Kyrozis, O. I. Claudio, P. K. Stanton, S. L. Moshé, Sex-specific KCC2 expression and  
817 GABA(A) receptor function in rat substantia nigra. *Exp. Neurol*. **183**, 628–637 (2003).
- 818 84. A. S. Galanopoulou, Sex- and cell-type-specific patterns of GABAA receptor and estradiol-mediated  
819 signaling in the immature rat substantia nigra. *European Journal of Neuroscience*. **23**, 2423–2430 (2006).
- 820 85. T. S. Perrot-Sinal, C. J. Sinal, J. C. Reader, D. B. Speert, M. M. McCarthy, Sex differences in the chloride  
821 cotransporters, NKCC1 and KCC2, in the developing hypothalamus. *J. Neuroendocrinol*. **19**, 302–308 (2007).

822

823

824

825

826

827

828

829

830

831

832

833

834

835

836

837

838

839

840

841

842

843

844

845

846

847

848

849

850

851

852



853 **Acknowledgments:**

854 **Funding:** This work was supported by the Eunice Kennedy Shriver National Institute of Child  
855 Health and Human Development of the National Institutes of Health under Award Number  
856 R01HD090884 (SDK). The content is solely the responsibility of the authors and does not  
857 necessarily represent the official views of the National Institutes of Health.

858

859 **Author contributions:** SDK designed research; PAK, BJS, BMC, and SDK performed research;  
860 PAK, BJS, and SDK analyzed data; PAK, BJS, and SDK wrote the paper.

861

862 **Competing interests:** The authors declare no conflict of interest.

863

864

865

866

867

868

869

870

871

872

873

874 **Figures and Tables**

875 **Fig. 1.**

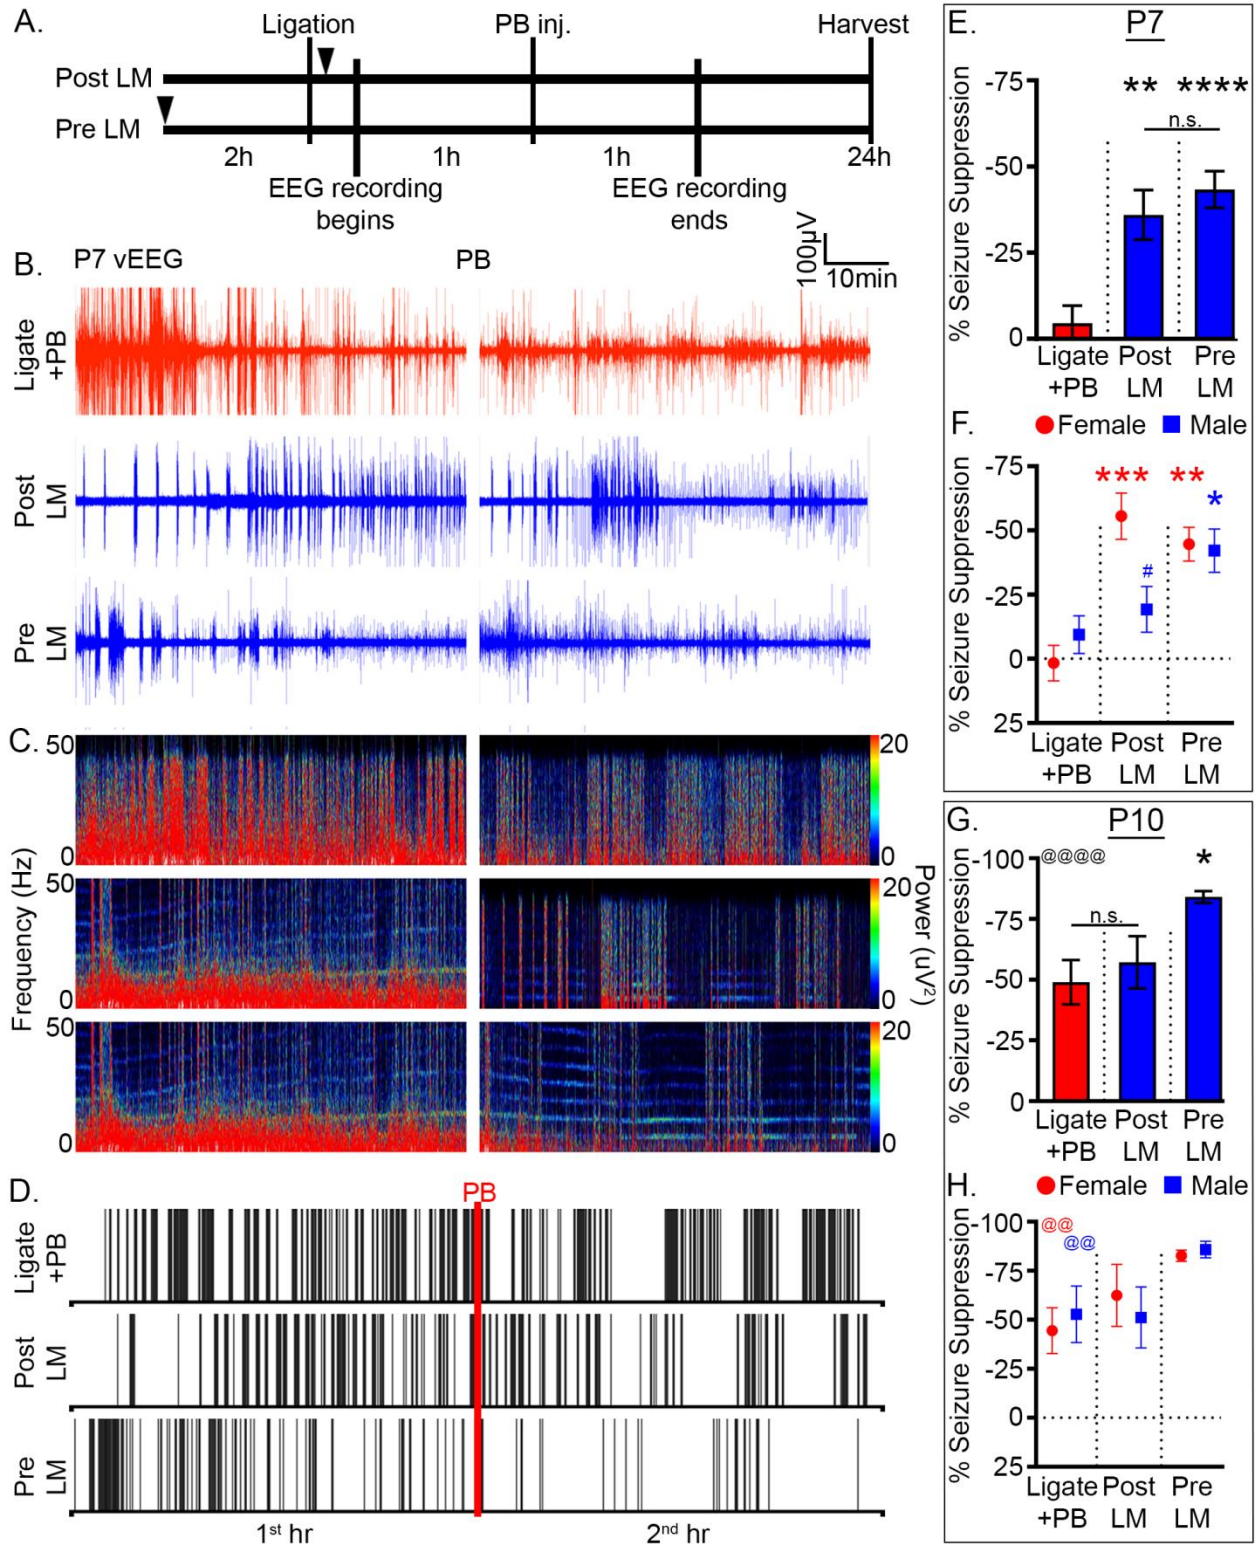

876

877 **Fig. 1. LM significantly rescued PB-refractoriness.** (A) Experimental paradigm to evaluate  
878 LM efficacy in a mouse model of ischemic neonatal seizures. Pups were randomly assigned to  
879 treatment groups (see Table S1 for sample sizes). Black arrowheads indicate time point of LM  
880 intervention. (B) Representative EEG traces, (C) power spectrograms (0-50Hz), and (D) raster  
881 plots showing significantly rescued PB-refractoriness in Post and Pre LM pups. Red line  
882 indicates time point of PB administration. (E) EEG Percent seizure suppression for Ligate+PB,  
883 Post LM, and Pre LM treated P7 pups. \*\*  $p < 0.01$  (Post LM vs. Ligate+PB), \*\*\*\*  $p < 0.0001$  (Pre  
884 LM vs. Ligate+PB) by one-way ANOVA. (F) EEG Percent seizure suppression by sex for  
885 Ligate+PB, Post LM, and Pre LM treated P7 pups. \*  $p < 0.05$  (Male Pre LM vs. Male Ligate+PB),  
886 \*\*  $p < 0.01$  (Female Pre LM vs. Female Ligate+PB), \*\*\*  $p < 0.001$  (Female Post LM vs. Female  
887 Ligate+PB) by two-way ANOVA. # indicated within-group sex differences; #  $p < 0.05$  by two-  
888 tailed  $t$  test. (G) EEG Percent seizure suppression for Ligate+PB, Post LM, and Pre LM treated  
889 P10 pups. \*  $p < 0.01$  (Pre LM vs. Ligate+PB) by one-way ANOVA. @ indicates difference  
890 between P7 and P10; @@@@  $p < 0.0001$  by two-tailed  $t$  test. (H) EEG Percent seizure  
891 suppression by sex for Ligate+PB, Post LM, and Pre LM treated P10 pups. @ indicates sex  
892 differences between P7 and P10; @@  $p < 0.01$  by two-tailed  $t$  test.

893

894

895

896

897

898

899 **Fig. 2.**

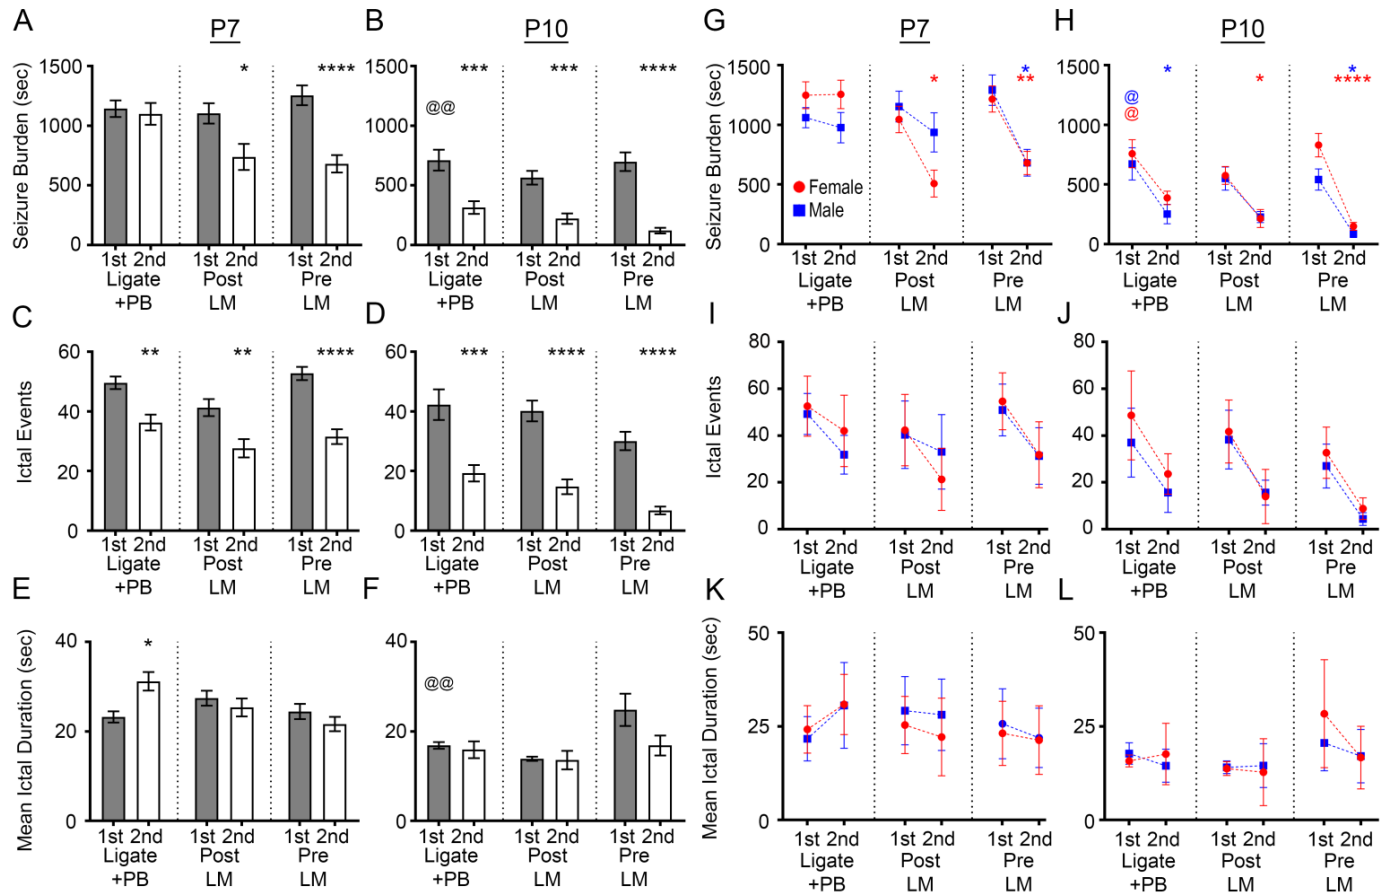

900  
901

902 **Fig. 2. LM efficacy was sexually dimorphic and driven by significant reduction of ictal**  
 903 **events, but not ictal durations at both P7 and P10. (A) EEG seizure burdens for Ligate+PB,**  
 904 **Post LM, and Pre LM treated P7 pups. \*  $p < 0.05$  (2<sup>nd</sup> Post LM vs. 1<sup>st</sup> Post LM), \*\*\*\*  $p < 0.0001$**   
 905 **(2<sup>nd</sup> Pre LM vs. 1<sup>st</sup> Pre LM) by two-way ANOVA. (B) EEG seizure burdens for Ligate+PB, Post**  
 906 **LM, and Pre LM treated P10 pups. \*\*\*  $p < 0.001$  (2<sup>nd</sup> Ligate+PB vs. 1<sup>st</sup> Ligate+PB, and 2<sup>nd</sup> Post**  
 907 **LM vs. 1<sup>st</sup> Post LM), \*\*\*\*  $p < 0.0001$  (2<sup>nd</sup> Pre LM vs. 1<sup>st</sup> Pre LM) by two-way ANOVA. @**  
 908 **indicates differences between P7 and P10; @@  $p < 0.01$  by two-tailed  $t$  test. (C) EEG ictal events**  
 909 **for Ligate+PB, Post LM, and Pre LM treated P7 pups. \*\*  $p < 0.001$  (2<sup>nd</sup> Ligate+PB vs. 1<sup>st</sup>**  
 910 **Ligate+PB, and 2<sup>nd</sup> Post LM vs. 1<sup>st</sup> Post LM), \*\*\*\*  $p < 0.0001$  (2<sup>nd</sup> Pre LM vs. 1<sup>st</sup> Pre LM) by**

911 two-way ANOVA. **(D)** EEG ictal events for Ligate+PB, Post LM, and Pre LM treated P10 pups.  
912 \*\*\*  $p < 0.001$  (2<sup>nd</sup> Ligate+PB vs. 1<sup>st</sup> Ligate+PB), \*\*\*\*  $p < 0.0001$  (2<sup>nd</sup> Post LM vs. 1<sup>st</sup> Post LM,  
913 and 2<sup>nd</sup> Pre LM vs. 1<sup>st</sup> Pre LM) by two-way ANOVA. **(E)** EEG mean ictal durations for  
914 Ligate+PB, Post LM, and Pre LM treated P7 pups. \*  $p < 0.05$  (2<sup>nd</sup> Ligate+PB vs. 1<sup>st</sup> Ligate+PB)  
915 by two-way ANOVA. **(F)** EEG mean ictal durations for Ligate+PB, Post LM, and Pre LM  
916 treated P10 pups. **(G)** EEG seizure burdens by sex for Ligate+PB, Post LM, and Pre LM treated  
917 P7 pups. \*  $p < 0.05$  (2<sup>nd</sup> Female Post LM vs. 1<sup>st</sup> Female Post LM, and 2<sup>nd</sup> Male Pre LM vs. 1<sup>st</sup>  
918 Male Pre LM), \*\*  $p < 0.01$  (2<sup>nd</sup> Female Pre LM vs. 1<sup>st</sup> Female Pre LM) by two-way ANOVA. **(H)**  
919 EEG seizure burdens by sex for Ligate+PB, Post LM, and Pre LM treated P10 pups. \*  $p < 0.05$   
920 (2<sup>nd</sup> Male Ligate+PB vs. 1<sup>st</sup> Male Ligate+PB, 2<sup>nd</sup> Female Post LM vs. 1<sup>st</sup> Female Post LM, and  
921 2<sup>nd</sup> Male Pre LM vs. 1<sup>st</sup> Male Pre LM), \*\*\*\*  $p < 0.0001$  (2<sup>nd</sup> Female Pre LM vs. 1<sup>st</sup> Female Pre  
922 LM) by two-way ANOVA. @  $p < 0.05$  by two-tailed  $t$  test. **(I)** EEG ictal events by sex for  
923 Ligate+PB, Post LM, and Pre LM treated P7 and **(J)** P10 pups. **(K)** EEG mean ictal durations by  
924 sex for Ligate+PB, Post LM, and Pre LM treated P7 and **(L)** P10 pups.

925

926

927

928

929

930

931

932

933

934 **Fig. 3.**

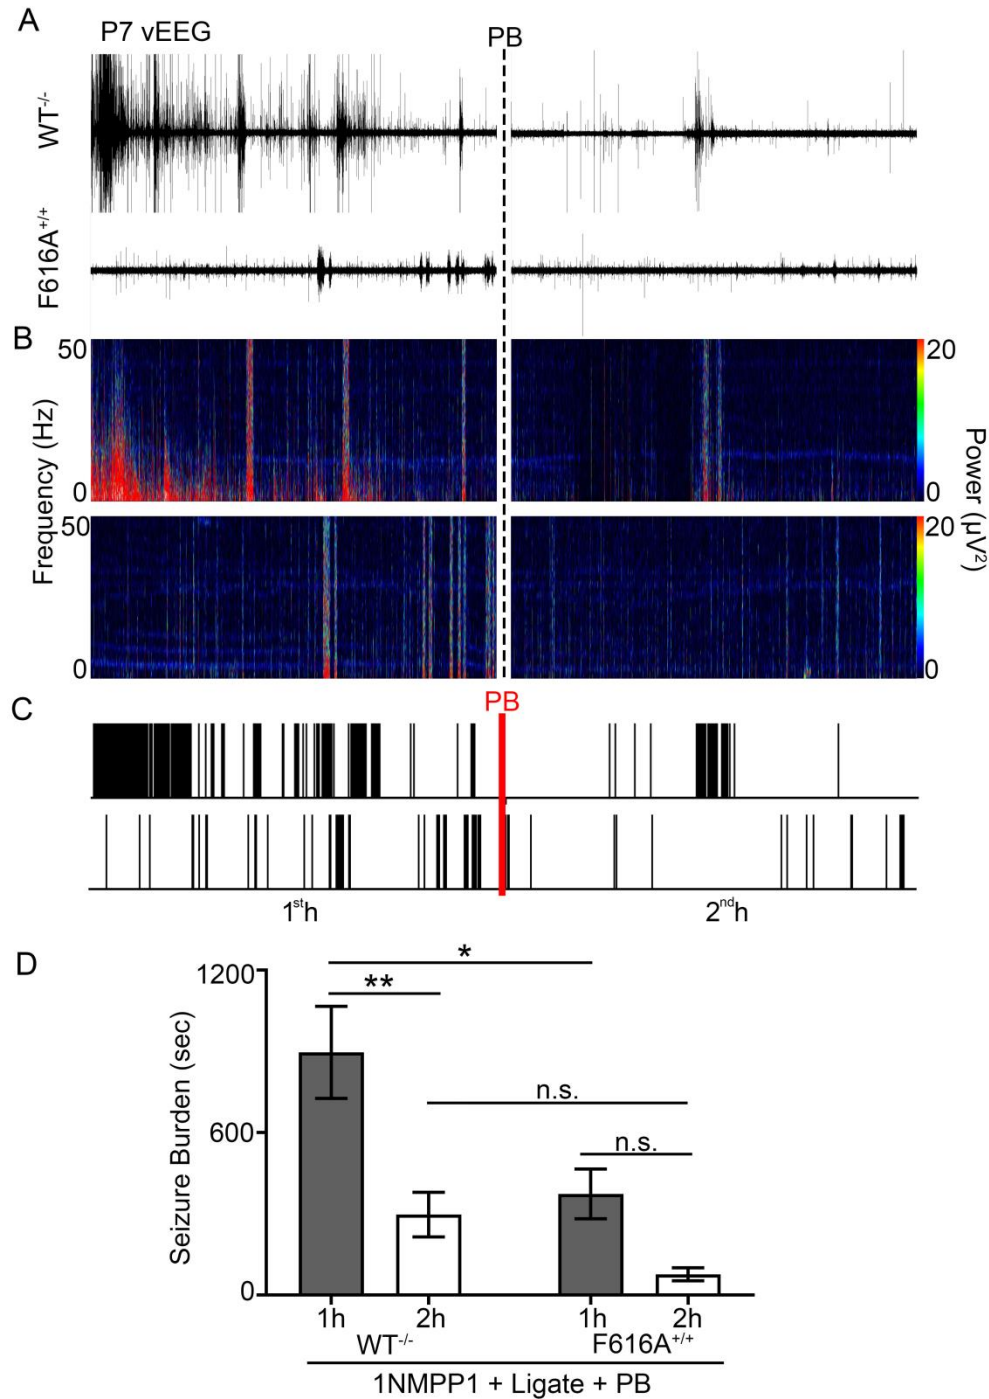

935

936 **Fig. 3. Post-ischemic TrkB activation underlies neonatal seizure susceptibility. (A)**

937 Representative EEG traces in WT<sup>-/-</sup> and mutant F616A<sup>+/+</sup> pups, **(B)** power spectrograms (0-

938 50Hz), and **(C)** raster plots showed significantly lower 1<sup>st</sup> h post-ischemic EEG seizure burdens

939 in F616A<sup>+/+</sup> pups. Dotted black and red lines indicate time point of PB administration. **(D)** EEG  
 940 seizure burdens during 1<sup>st</sup> and 2<sup>nd</sup> h post-ligation in WT<sup>-/-</sup> and F616A<sup>+/+</sup> pups. \* p<0.05, \*\*  
 941 p<0.01 by two-way ANOVA.

942

943 **Fig. 4.**

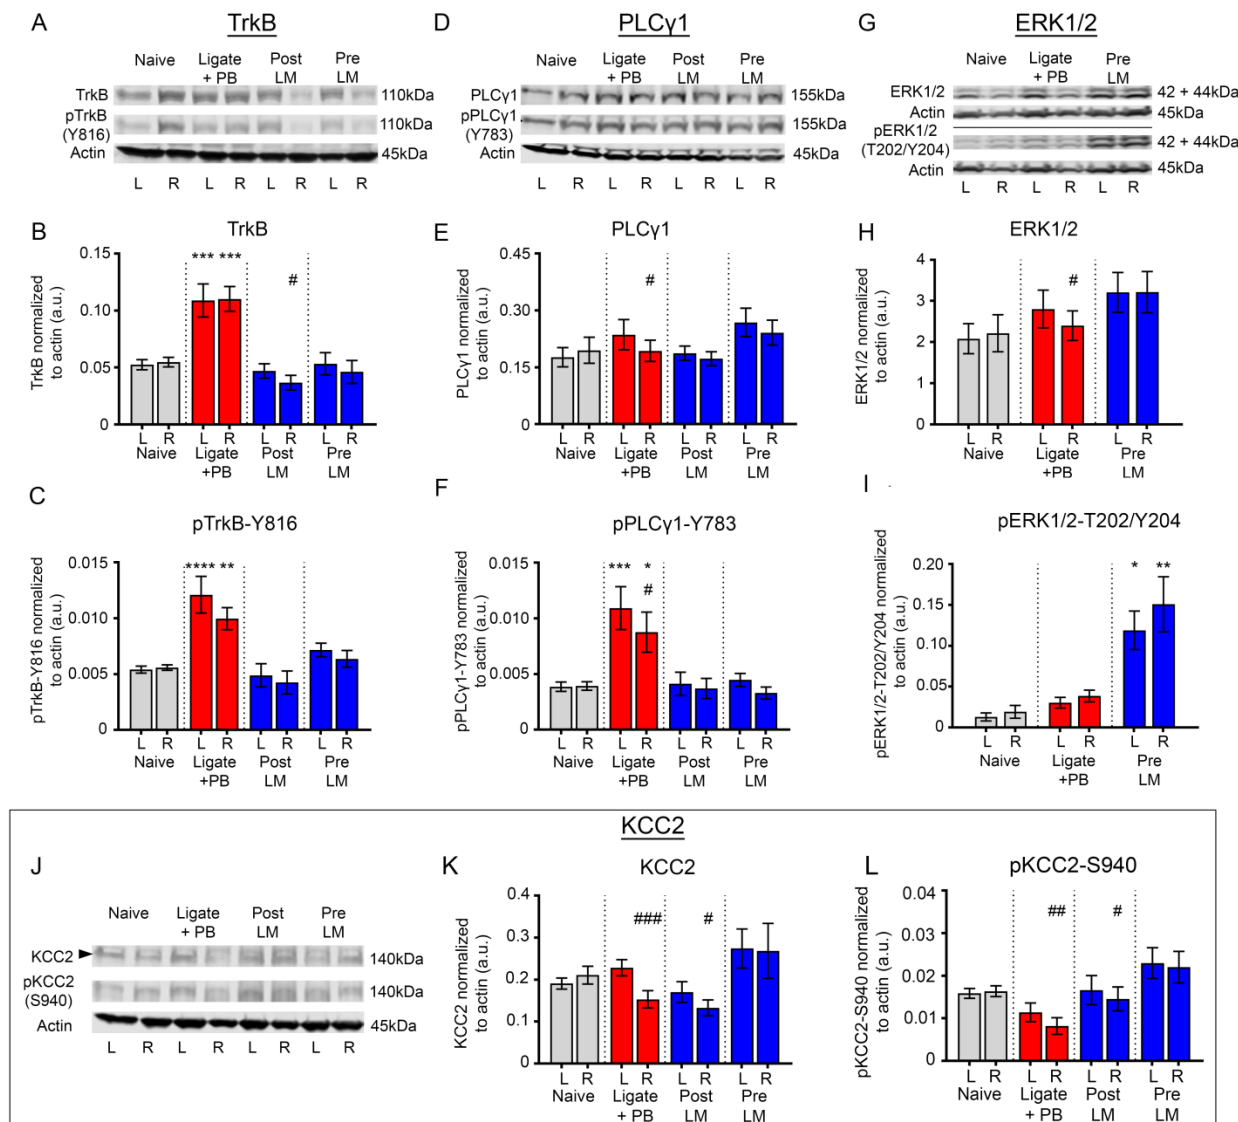

944

945

946 **Fig. 4. LM rescued post-ischemic TrkB-PLC $\gamma$ 1 pathway activation, activated the TrkB-**  
947 **ERK1/2 pathway, and rescued ipsilateral KCC2 degradation.** All proteins of interest were  
948 normalized to housekeeping protein  $\beta$ -actin. Phospho-proteins were also normalized to their  
949 respective total protein (see Figure S3). \* indicate differences between treatment group and naïve  
950 controls; # indicated differences between contralateral and ipsilateral hemispheres within groups.  
951 **(A)** Representative Western blots showing TrkB and pTrkB-Y816 expression for all treatment  
952 groups. **(B)** Contralateral (L) and ipsilateral (R) TrkB expression 24h after ischemic insult for all  
953 treatment groups. \*\*\*  $p < 0.001$  by one-way ANOVA. #  $p < 0.05$  by two-tailed  $t$  test. **(C)**  
954 Contralateral (L) and ipsilateral (R) pTrkB-Y816 expression 24h after ischemic insult for all  
955 treatment groups. \*\*  $p < 0.01$ , \*\*\*\*  $p < 0.0001$  by one-way ANOVA. **(D)** Representative Western  
956 blots showing PLC $\gamma$ 1 and pPLC $\gamma$ 1-Y783 expression for all treatment groups. **(E)** Contralateral  
957 (L) and ipsilateral (R) PLC $\gamma$ 1 expression 24h after ischemic insult for all treatment groups. #  
958  $p < 0.05$  by two-tailed  $t$  test. **(F)** Contralateral (L) and ipsilateral (R) pPLC $\gamma$ 1-Y783 expression  
959 24h after ischemic insult for all treatment groups. \*  $p < 0.05$ , \*\*\*  $p < 0.001$  by one-way ANOVA. #  
960  $p < 0.05$  by two-tailed  $t$  test. **(G)** Representative Western blots showing ERK1/2 and pERK1/2-  
961 T202/Y204 expression for all treatment groups. **(H)** Contralateral (L) and ipsilateral (R) ERK1/2  
962 expression 24h after ischemic insult for all treatment groups. #  $p < 0.05$  by two-tailed  $t$  test. **(I)**  
963 Contralateral (L) and ipsilateral (R) pERK1/2-T202/Y204 expression 24h after ischemic insult  
964 for all treatment groups. \*  $p < 0.05$ , \*\*  $p < 0.01$  by one-way ANOVA. **(J)** Representative Western  
965 blots showing KCC2 and pKCC2-S940 expression for all treatment groups. **(K)** Contralateral (L)  
966 and ipsilateral (R) KCC2 expression 24h after ischemic insult for all treatment groups. #  $p < 0.05$ ,  
967 ####  $p < 0.001$  by two-tailed  $t$  test. **(L)** Contralateral (L) and ipsilateral (R) pKCC2-S940



968 expression 24h after ischemic insult for all treatment groups. #  $p < 0.05$ , ##  $p < 0.01$  by two-tailed  $t$   
 969 test.

970

971 **Fig. 5.**

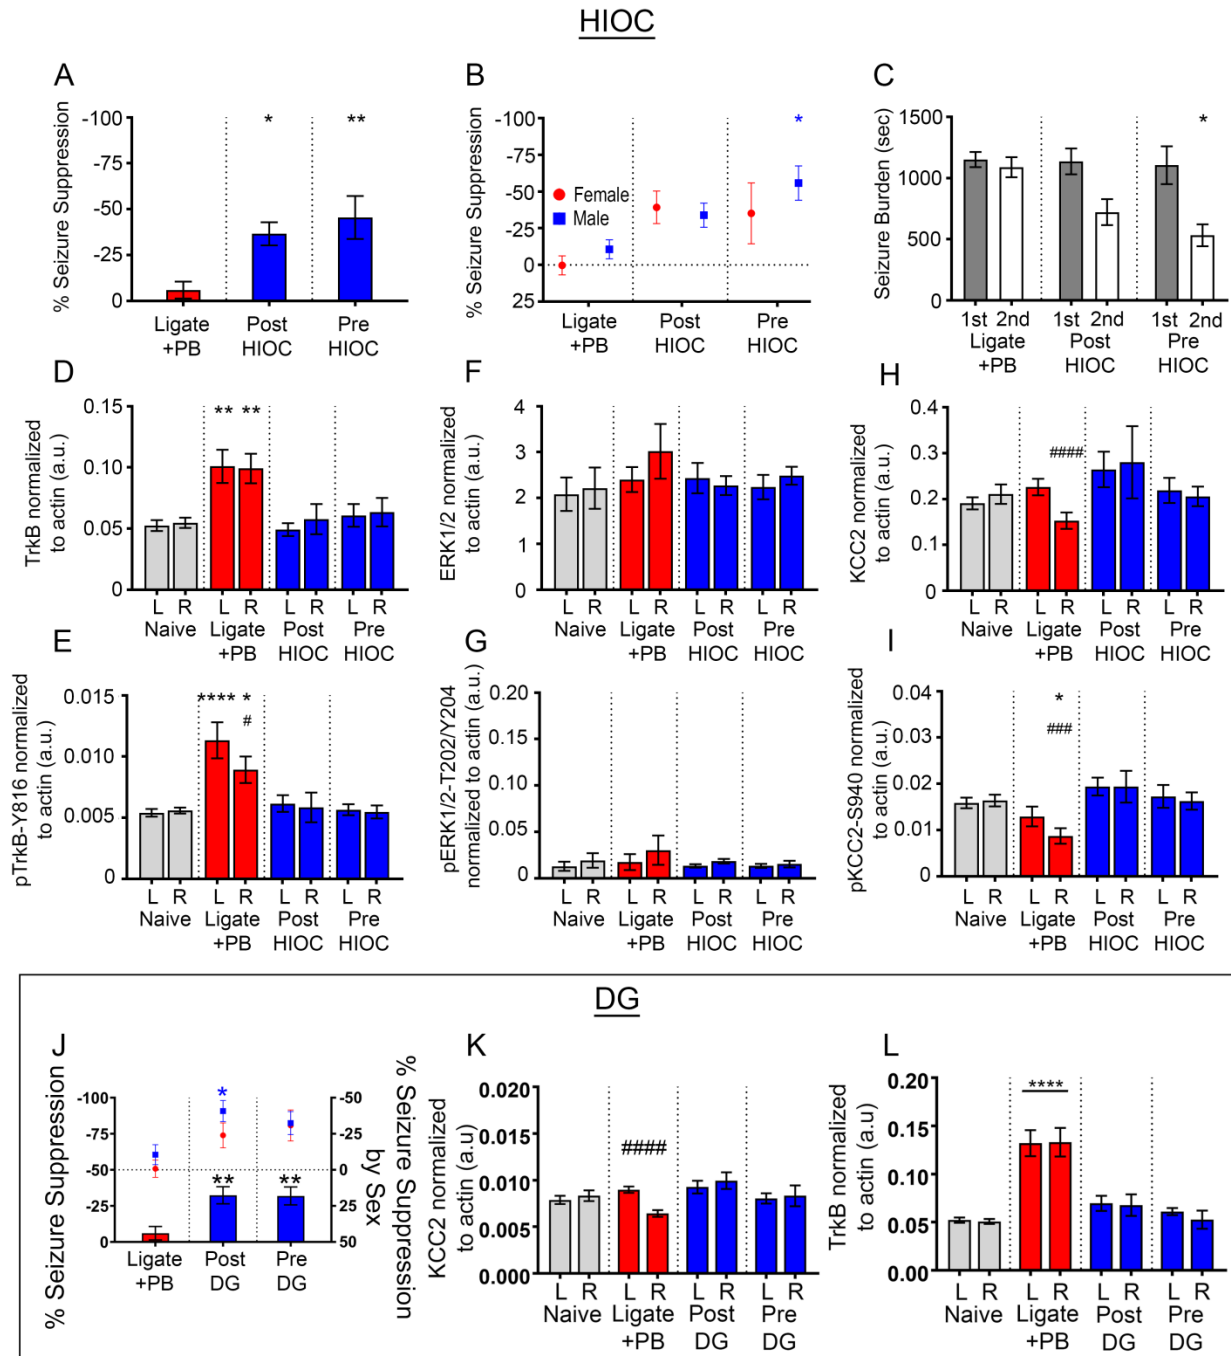

972

973 **Fig. 5. HIOC and DG significantly rescued PB-refractory seizures at P7. (A)** EEG Percent  
974 seizure suppression for Ligate+PB, Post HIOC, and Pre HIOC treated P7 pups. \*  $p < 0.05$ , \*\*  
975  $p < 0.01$  by one-way ANOVA. **(B)** EEG Percent seizure suppression by sex for Ligate+PB, Post  
976 HIOC, and Pre HIOC treated P7 pups. \*  $p < 0.05$  by two-way ANOVA. **(C)** EEG seizure burdens  
977 for Ligate+PB, Post HIOC, and Pre HIOC treated P7 pups. \*  $p < 0.05$  by two-way ANOVA. **(D)**  
978 Contralateral (L) and ipsilateral (R) TrkB expression 24h after ischemic insult for all treatment  
979 groups. \*\*  $p < 0.01$  by one-way ANOVA. All proteins were normalized to housekeeping protein  
980  $\beta$ -actin. **(E)** Contralateral (L) and ipsilateral (R) pTrkB-Y816 expression 24h after ischemic  
981 insult for all treatment groups. \*  $p < 0.05$ . \*\*\*\*  $p < 0.0001$  by one-way ANOVA. # indicated  
982 differences between contralateral and ipsilateral hemispheres within groups; #  $p < 0.05$  by two-  
983 tailed  $t$  test. **(F)** Contralateral (L) and ipsilateral (R) ERK1/2 expression 24h after ischemic insult  
984 for all treatment groups. **(G)** Contralateral (L) and ipsilateral (R) pERK1/2-T202/Y204  
985 expression 24h after ischemic insult for all treatment groups. **(H)** Contralateral (L) and ipsilateral  
986 (R) KCC2 expression 24h after ischemic insult for all treatment groups. #####  $p < 0.0001$  by two-  
987 tailed  $t$  test. **(I)** Contralateral (L) and ipsilateral (R) pKCC2-S940 expression 24h after ischemic  
988 insult for all treatment groups. \*  $p < 0.05$  by one-way ANOVA. ###  $p < 0.001$  by two-tailed  $t$  test.  
989 **(J)** EEG percent seizure suppression for Ligate+PB, Post DG, and Pre DG treatment groups  
990 plotted against left y-axis. \*\*  $p < 0.01$  by one-way ANOVA. EEG percent seizure suppression by  
991 sex for Ligate+PB, Post DG, and Pre DG treatment groups plotted against right y-axis. \*  $p < 0.05$   
992 by two-way ANOVA. Horizontal dotted line represents 0% seizure suppression on right y-axis.  
993 **(K)** Contralateral (L) and ipsilateral (R) KCC2 expression 24h after ischemic insult for all  
994 treatment groups. # signified hemispheric differences within treatment groups. #####  $p < 0.0001$  by

995 two-tailed *t* test. (L) Contralateral (L) and ipsilateral (R) TrkB expression 24h after ischemic  
 996 insult for all treatment groups. \*\*\*\*  $p < 0.0001$  by one-way ANOVA.

997

998 **Fig. 6.**

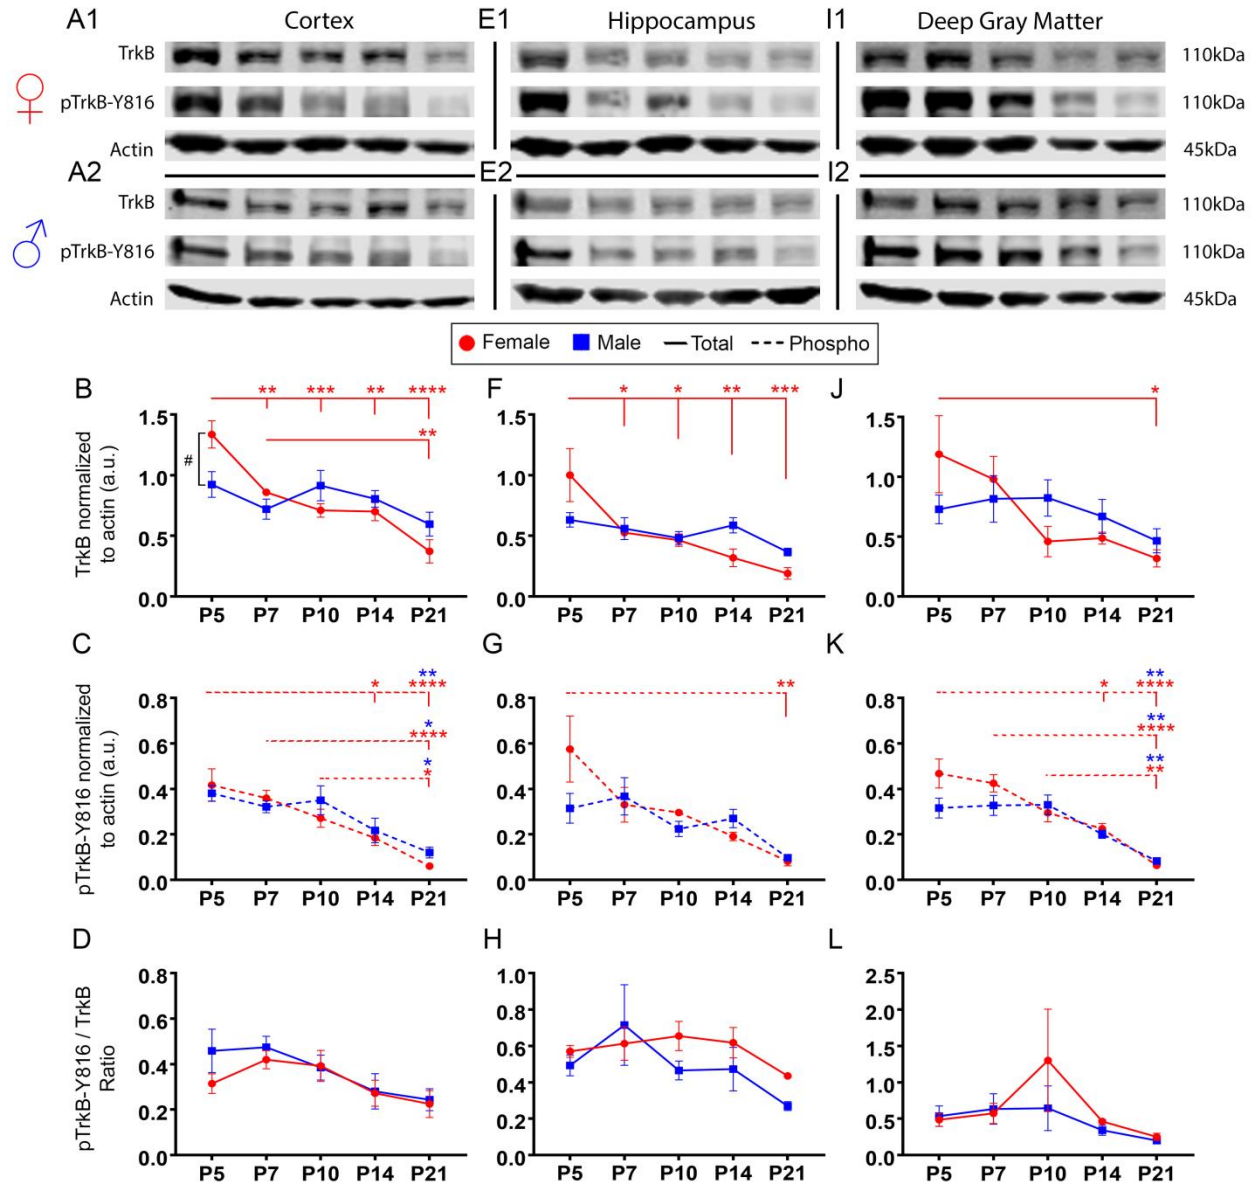

999  
 1000

1001 **Fig. 6. TrkB expression significantly decreased from P5 to P21 in a region-specific manner**  
 1002 **in naïve female pups.** All proteins were normalized to  $\beta$ -actin. (A1) Representative Western

1003 blots showing TrkB and pTrkB-Y816 expression in cortex for all female and **(A2)** male age  
1004 groups. **(B)** TrkB expression in cortical tissue from P5 to P21. \*\*  $p < 0.01$ , \*\*\*  $p < 0.001$ , \*\*\*\*  
1005  $p < 0.0001$  by two-way ANOVA. **(C)** pTrkB-Y816 expression in cortical tissue from P5 to P21. #  
1006  $p < 0.05$  signified difference between sexes at a given age. \*  $p < 0.05$ , \*\*  $p < 0.01$ , \*\*\*\*  $p < 0.0001$   
1007 by two-way ANOVA. **(D)** pTrkB-Y816 normalized to total TrkB in cortical tissue from P5 to  
1008 P21. **(E1)** Representative Western blots showing TrkB and pTrkB-Y816 expression in  
1009 hippocampus for all female and **(E2)** male age groups. **(F)** TrkB expression in hippocampal  
1010 tissue from P5 to P21. \*  $p < 0.05$ , \*\*  $p < 0.01$ , \*\*\*  $p < 0.001$  by two-way ANOVA. **(G)** pTrkB-  
1011 Y816 expression in hippocampal tissue from P5 to P21. \*\*  $p < 0.01$  by two-way ANOVA. **(H)**  
1012 pTrkB-Y816 normalized to total TrkB in cortical tissue from P5 to P21. **(I1)** Representative  
1013 Western blots showing TrkB and pTrkB-Y816 expression in deep gray matter for all female and  
1014 **(I2)** male age groups. **(J)** TrkB expression in deep gray matter from P5 to P21. \*  $p < 0.05$  by two-  
1015 way ANOVA. **(K)** pTrkB-Y816 expression in deep gray matter from P5 to P21. \*  $p < 0.05$ , \*\*  
1016  $p < 0.01$ , \*\*\*\*  $p < 0.0001$  by two-way ANOVA. **(L)** pTrkB-Y816 normalized to total TrkB in deep  
1017 gray matter from P5 to P21.

1018

1019

1020

1021

1022

1023

1024

1025

1026 **Fig. 7.**

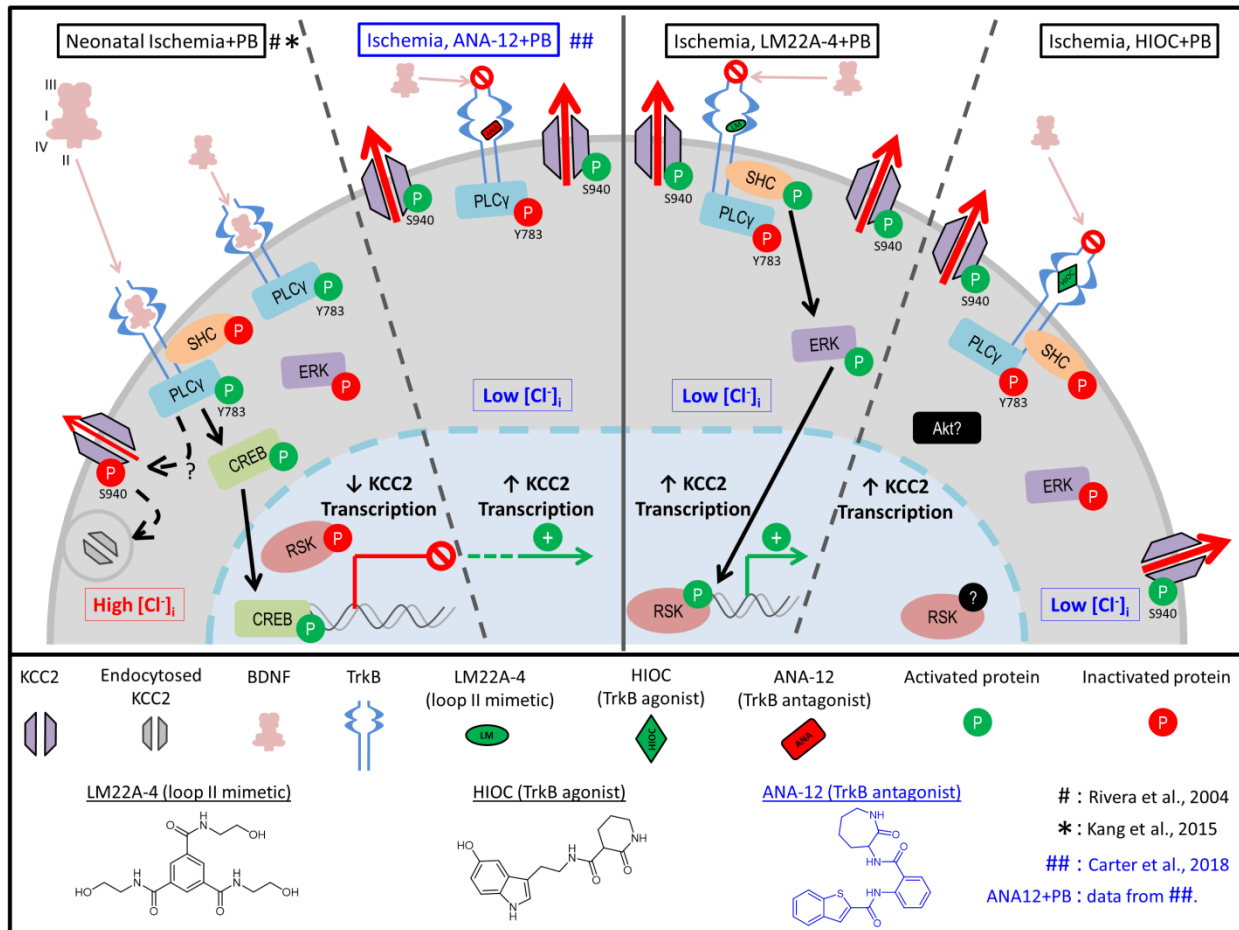

1027

1028 **Fig. 7. Summary schematic of TrkB signaling pathways following neonatal ischemia.** Post-  
 1029 ischemia endogenous BDNF release results in activation of the TrkB-PLCγ1 pathway, thereby  
 1030 down-regulating KCC2 expression (data summarized from 13, 40) 24h post-ischemia. Treatment  
 1031 with the small-molecule TrkB antagonist ANA12 rescued post-ischemic TrkB-PLCγ1 pathway  
 1032 activation-mediated KCC2 degradation (data summarized from (5)). Intervention with LM22A-4  
 1033 a TrkB partial agonist also rescued TrkB-PLCγ1 pathway activation similar to ANA12, and  
 1034 activated the TrkB-ERK1/2 pathway instead. Treatment with full TrkB agonist HIOC replicated  
 1035 the LM findings and rescued TrkB-PLCγ1 pathway activation but did not activate the TrkB-  
 1036 ERK1/2 pathway indicating TrkB site-specific engagement dictate downstream cascades.

1037 **Supplementary Materials**

1038 **Fig. S1.**

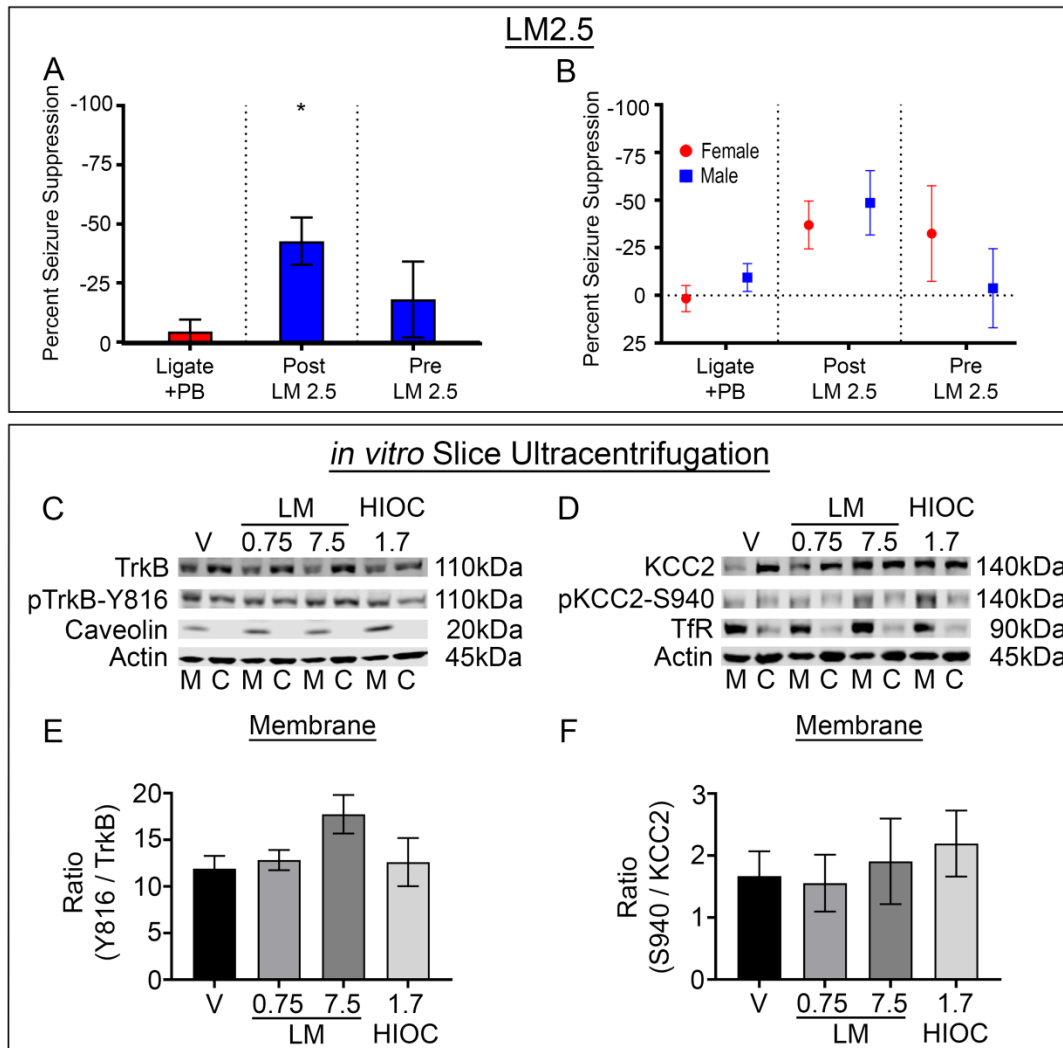

1039

1040 **Fig. S1. LM graded dose failed to significantly improve on in vivo anti-seizure efficacy and**

1041 **in vitro TrkB phosphorylation in naïve P7 brain slices. (A) EEG percent seizure suppression**

1042 **for Ligate+PB, Post LM 2.5, and Pre LM 2.5 treated P7 pups. \* p<0.05 (Post LM2.5 vs.**

1043 **Ligate+PB) by one-way ANOVA. (B) EEG percent seizure suppression by sex for Ligate+PB,**

1044 **Post LM 2.5, and Pre LM 2.5 treated P7 pups. (C) Representative Western blot showing**

1045 **membrane and cytosolic TrkB and pTrkB-Y816 expression after incubation with TrkB agonists.**

1046 **(D) Representative Western blot showing membrane and cytosolic KCC2 and pKCC2-S940**

1047 expression after incubation with TrkB agonists. **(E)** Ratio of pTrkB-Y816 to total TrkB at the  
1048 plasma membrane. **(F)** Ratio of pKCC2-S940 to total KCC2 at the plasma membrane.

1049

1050 **Fig. S2.**

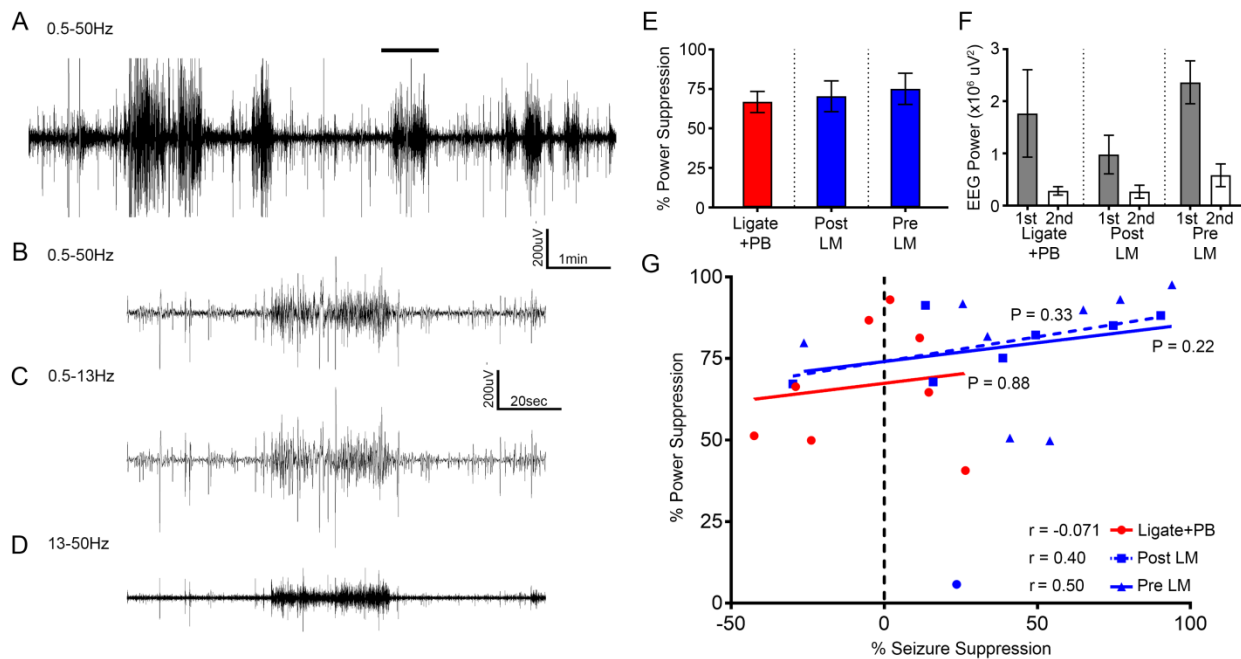

1051

1052 **Fig. S2. EEG power alone failed to identify the LM-mediated rescue of PB-refractoriness in**

1053 **P7 pups.** **(A)** Representative raw 10 min EEG trace from 0.5-50Hz of refractory ischemic

1054 seizures from a neonatal P7 mouse pup. **(B)** A single ictal event from **A** (solid bar – 2 min

1055 expanded timescale raw trace). **(C and D)** Filtered EEG trace of the same ictal event in **B** filtered

1056 to show low frequency and high frequency components of the same ictal event (0.5-13Hz and

1057 13-50Hz). **(E)** EEG percent power suppression for Ligate+PB, Post LM, and Pre LM treated P7

1058 pups. **(F)** EEG 1<sup>st</sup> and 2<sup>nd</sup> hour EEG powers for Ligate+PB, Post LM, and Pre LM treated P7

1059 pups. **(G)** Percent power suppression plotted as a function of percent seizure suppression. Post-

1060 hoc comparisons were performed using Spearman's two-tailed nonparametric test.

1061

1062 **Fig. S3.**

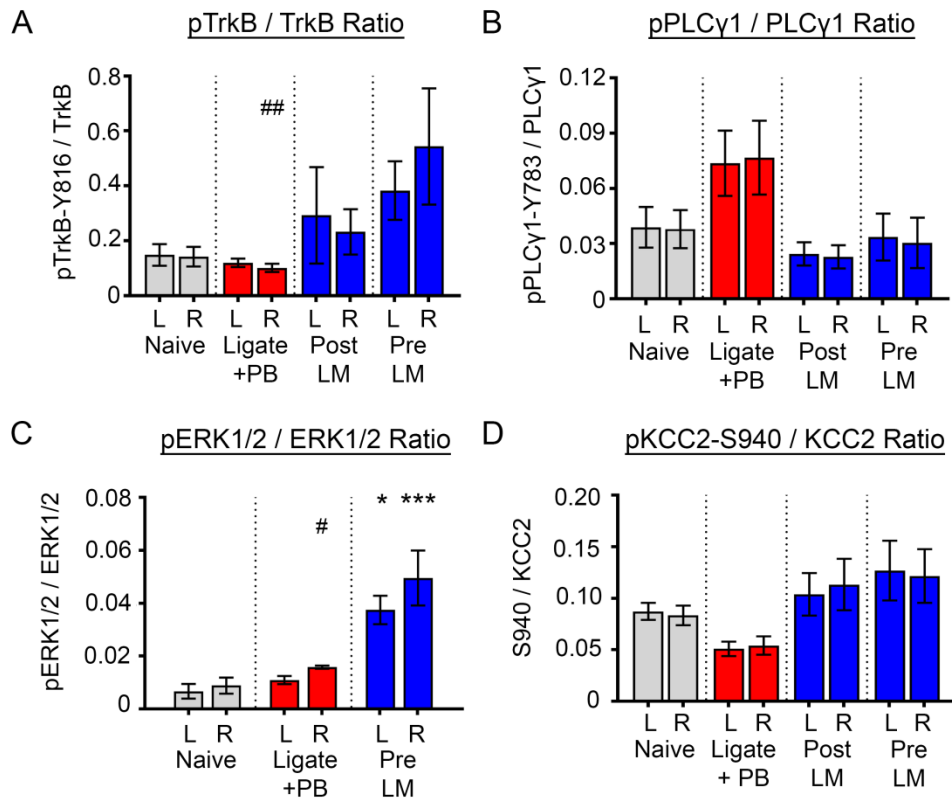

1063

1064 **Fig. S3. Normalization of phospho-proteins to their total proteins in P7 ischemic pups. (A)**

1065 pTrkB-Y816 normalized to total TrkB for Naïve, Ligate+PB, Post LM, and Pre LM at P7. #

1066 signified hemispheric differences within groups, ##  $p < 0.01$  by two-tailed  $t$  test. (B) pPLCγ1-

1067 Y783 normalized to total PLCγ1 for Naïve, Ligate+PB, Post LM, and Pre LM at P7. (C)

1068 pERK1/2 normalized to total ERK1/2 for Naïve, Ligate+PB, and Pre LM at P7. \*  $p < 0.05$ , \*\*\*

1069  $p < 0.001$  by one-way ANOVA. #  $p < 0.05$  by two-tailed  $t$  test. (D) pKCC2-S940 normalized to

1070 total KCC2 for Naïve, Ligate+PB, Post LM, and Pre LM at P7.

1071

1072

1073

1074



1075 **Fig. S4.**

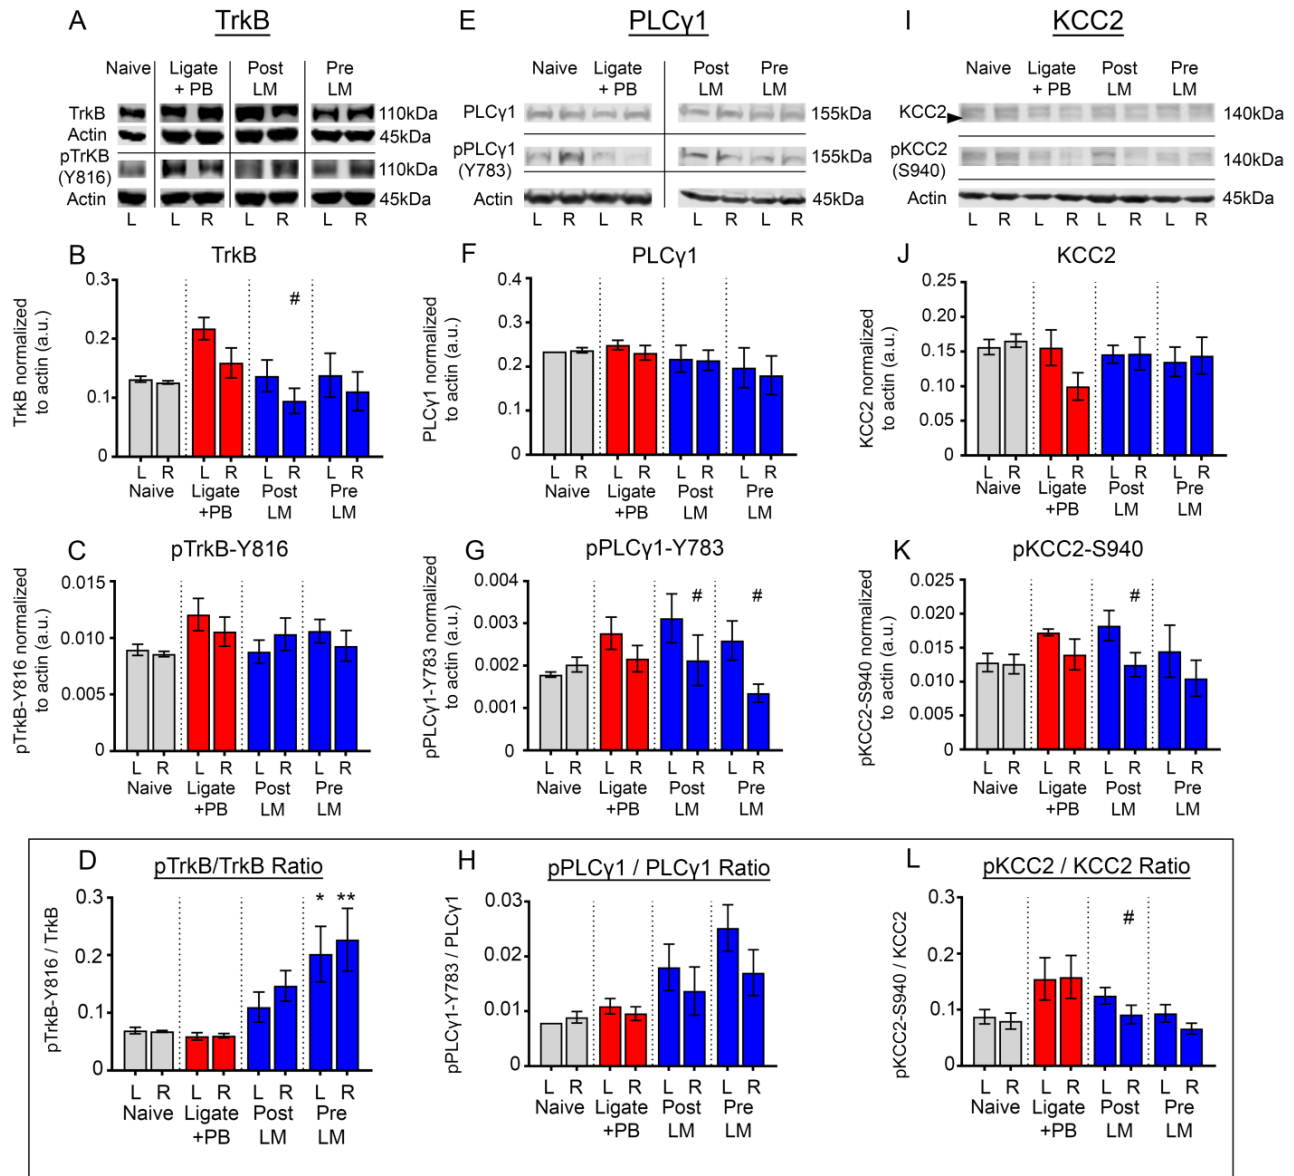

1076

1077 **Fig. S4. TrkB-pathway activation was not significant in P10 ischemic pups.** All proteins of

1078 interest were normalized to housekeeping protein  $\beta$ -actin. (A) Representative Western blots

1079 showing TrkB and pTrkB-Y816 expression in P10 pups. (B) Contralateral (L) and ipsilateral (R)

1080 TrkB expression 24h after ischemic insult for all treatment groups. # signified hemispheric

1081 differences within groups. #  $p < 0.05$  by two-tailed  $t$  test. (C) Contralateral (L) and ipsilateral (R)

1082 pTrkB-Y816 expression 24h after ischemic insult for all treatment groups. (D) pTrkB-Y816

1083 normalized to total TrkB for Naïve, Ligate+PB, Post LM, and Pre LM at P10. \*  $p < 0.05$ , \*\*  
1084  $p < 0.01$  by one-way ANOVA. **(E)** Representative Western blots showing PLC $\gamma$ 1 and pPLC $\gamma$ 1-  
1085 Y783 expression. **(F)** Contralateral (L) and ipsilateral (R) PLC $\gamma$ 1 expression 24h after ischemic  
1086 insult for all treatment groups. **(G)** Contralateral (L) and ipsilateral (R) pPLC $\gamma$ 1-Y783 expression  
1087 24h after ischemic insult for all treatment groups. # signified hemispheric differences within  
1088 groups. #  $p < 0.05$  by two-tailed  $t$  test. **(H)** pPLC $\gamma$ 1-Y783 normalized to total PLC $\gamma$ 1 for Naïve,  
1089 Ligate+PB, Post LM, and Pre LM at P10. **(I)** Representative Western blots showing KCC2 and  
1090 pKCC2-S940 expression. **(J)** Contralateral (L) and ipsilateral (R) KCC2 expression 24h after  
1091 ischemic insult for all treatment groups. **(K)** Contralateral (L) and ipsilateral (R) pKCC2-S940  
1092 expression 24h after ischemic insult for all treatment groups. #  $p < 0.05$  by two-tailed  $t$  test. **(L)**  
1093 KCC2 normalized to total pKCC2-S940 for Naïve, Ligate+PB, Post LM, and Pre LM at P10. #  
1094 signified hemispheric differences within groups. #  $p < 0.05$ .

1095

1096

1097

1098

1099

1100

1101

1102

1103

1104

1105

1106 **Fig. S5.**

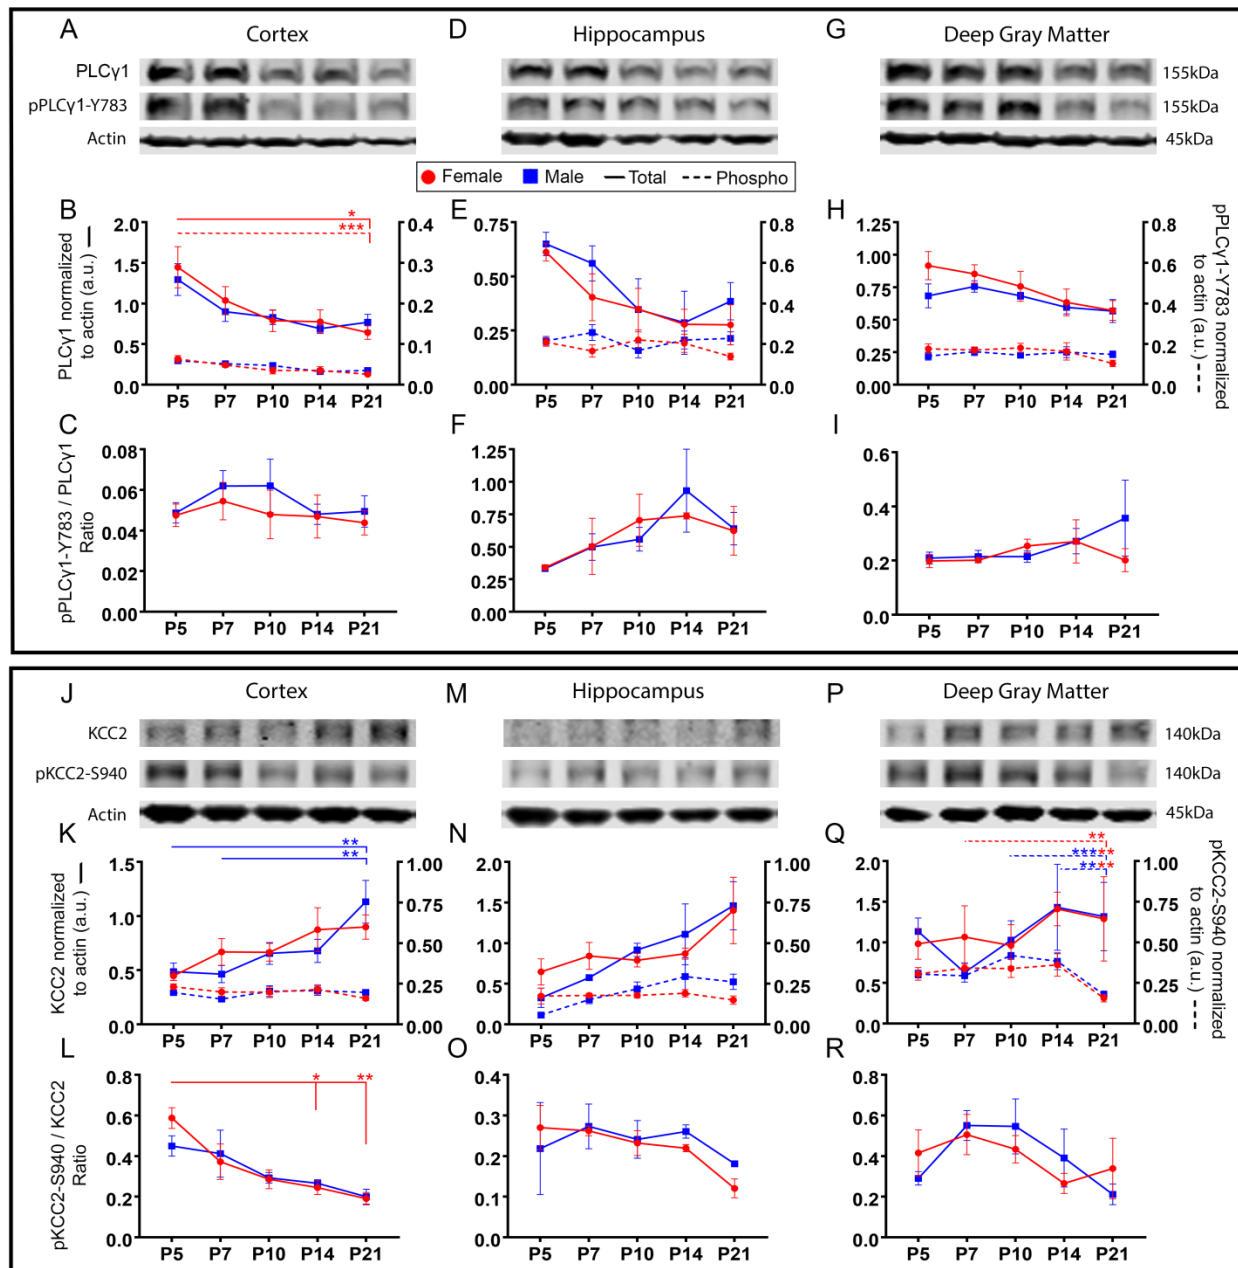

1107

1108 **Fig. S5. PLCγ1 and pPLCγ1-Y783 expression decreased significantly in female cortices,**

1109 **whereas KCC2 expression significantly increased in male cortices. All proteins were**

1110 **normalized to β-actin. (A) Representative Western blots showing PLCγ1 and pPLCγ1-Y783**

1111 **expression in cortical tissue. (B) PLCγ1 and pPLCγ1-Y783 expression in cortical tissue from P5**

1112 **to P21. \* p<0.05, \*\*\* p<0.001, \*\*\*\* p<0.0001 by two-way ANOVA. (C) pPLCγ1-Y783**

1113 normalized to total PLC $\gamma$ 1 in cortical tissue from P5 to P21. **(D)** Representative Western blots  
1114 showing PLC $\gamma$ 1 and pPLC $\gamma$ 1-Y783 expression in hippocampal tissue. **(E)** PLC $\gamma$ 1 and pPLC $\gamma$ 1-  
1115 Y783 expression in hippocampal tissue from P5 to P21. **(F)** pPLC $\gamma$ 1-Y783 normalized to total  
1116 PLC $\gamma$ 1 in hippocampal tissue from P5 to P21. **(G)** Representative Western blots showing PLC $\gamma$ 1  
1117 and pPLC $\gamma$ 1-Y783 expression in deep gray matter. **(H)** PLC $\gamma$ 1 and pPLC $\gamma$ 1-Y783 expression in  
1118 deep gray matter from P5 to P21. **(I)** pPLC $\gamma$ 1-Y783 normalized to total PLC $\gamma$ 1 in hippocampal  
1119 tissue from P5 to P21. **(J)** Representative Western blots showing KCC2 and pKCC2-S940  
1120 expression in cortical tissue. **(K)** KCC2 and pKCC2-S940 expression in cortical tissue from P5  
1121 to P21. \*\* p<0.01 by two-way ANOVA. **(L)** pKCC2-S940 normalized to total KCC2 in cortical  
1122 tissue from P5 to P21. \* p<0.05, \*\* p<0.01 by two-way ANOVA. **(M)** Representative Western  
1123 blots showing KCC2 and pKCC2-S940 expression in hippocampal tissue. **(N)** KCC2 and  
1124 pKCC2-S940 expression in cortical tissue from P5 to P21. **(O)** pKCC2-S940 normalized to total  
1125 KCC2 in hippocampal tissue from P5 to P21. **(P)** Representative Western blots showing KCC2  
1126 and pKCC2-S940 expression in deep gray matter. **(Q)** KCC2 and pKCC2-S940 expression in  
1127 deep gray matter from P5 to P21. \*\* p<0.01, \*\*\* p<0.001 by two-way ANOVA. **(R)** pKCC2-  
1128 S940 normalized to total KCC2 in deep gray matter from P5 to P21.

1129  
1130  
1131  
1132  
1133  
1134  
1135  
1136  
1137  
1138  
1139  
1140  
1141  
1142

1143 **Table S1. Sample sizes for experimental paradigms**

1144

1145

| <b>Sample size of pups in post-ligation EEG recordings</b>                                   |                                  |                     |                                     |                    |
|----------------------------------------------------------------------------------------------|----------------------------------|---------------------|-------------------------------------|--------------------|
| <b>Pups</b>                                                                                  | <b>Ligate+PB</b>                 | <b>Post LM 0.25</b> | <b>Pre LM 0.25</b>                  |                    |
| <b>P7 total (M/F) [litters]</b>                                                              | 28 (16/12) [9]                   | 26 (14/12) [6]      | 27 (14/13) [9]                      |                    |
| <b>P10 total (M/F) [litters]</b>                                                             | 11 (6/5) [3]                     | 13 (6/7) [3]        | 11 (5/6) [3]                        |                    |
| <b>Pups</b>                                                                                  | <b>Ligate+PB</b>                 | <b>Post LM 2.5</b>  | <b>Pre LM 2.5</b>                   |                    |
| <b>P7 total (M/F) [litters]</b>                                                              | 28 (16/12) [7]                   | 8 (4/4) [2]         | 8 (4/4) [2]                         |                    |
| <b>Pups</b>                                                                                  | <b>Ligate+PB</b>                 | <b>Post HIOC</b>    | <b>Pre HIOC</b>                     |                    |
| <b>P7 total (M/F) [litters]</b>                                                              | 28(16/12) [7]                    | 6 (3/3) [2]         | 8 (4/4) [2]                         |                    |
| <b>Pups</b>                                                                                  | <b>Ligate+PB</b>                 | <b>Post DG</b>      | <b>Pre DG</b>                       |                    |
| <b>P7 total (M/F) [litters]</b>                                                              | 28 (16/12) [7]                   | 16 (8/8) [2]        | 15 (10/5) [2]                       |                    |
| <b>Sample size of pups that underwent Western Blot analysis after EEG recordings</b>         |                                  |                     |                                     |                    |
| <b>Pups</b>                                                                                  | <b>Naïve</b>                     | <b>Ligate+PB</b>    | <b>Post LM 0.25</b>                 | <b>Pre LM 0.25</b> |
| <b>P7 total (M/F) [litters]</b>                                                              | 13 (6/7) [9]                     | 19 (10/9) [7]       | 13 (5/8) [6]                        | 22 (11/11) [9]     |
| <b>P10 total (M/F) [litters]</b>                                                             | 4 (2/2) [3]                      | 9 (5/4) [3]         | 12 (6/6) [3]                        | 11 (5/6) [3]       |
| <b>Pups</b>                                                                                  | <b>Naïve</b>                     | <b>Ligate+PB</b>    | <b>Post LM2.5</b>                   | <b>Pre LM2.5</b>   |
| <b>P7 total (M/F) [litters]</b>                                                              | 13 (6/7) [9]                     | 19 (10/9) [7]       | 8 (4/4) [2]                         | 8 (4/4) [2]        |
| <b>Pups</b>                                                                                  | <b>Naïve</b>                     | <b>Ligate+PB</b>    | <b>Post HIOC</b>                    | <b>Pre HIOC</b>    |
| <b>P7 total (M/F) [litters]</b>                                                              | 13 (6/7) [9]                     | 19 (10/9) [7]       | 5 (3/2) [2]                         | 6 (4/2) [2]        |
| <b>Pups</b>                                                                                  | <b>Naïve</b>                     | <b>Ligate+PB</b>    | <b>Post DG</b>                      | <b>Pre DG</b>      |
| <b>P7 total (M/F) [litters]</b>                                                              | 13 (6/7) [9]                     | 19 (10/9) [7]       | 6 (4/2) [2]                         | 7 (4/3) [2]        |
| <b>Sample size of pups that underwent Western Blot analysis in Developmental Series</b>      |                                  |                     |                                     |                    |
| <b>Pups</b>                                                                                  | <b>Cortex</b>                    | <b>Hippocampus</b>  | <b>Deep Gray Matter</b>             |                    |
| <b>P5 total (M/F) [litters]</b>                                                              | 4 (2/2) [3]                      | 3 (1/2) [3]         | 4 (2/2) [3]                         |                    |
| <b>P7 total (M/F) [litters]</b>                                                              | 4 (2/2) [3]                      | 6 (3/3) [3]         | 6 (3/3) [3]                         |                    |
| <b>P10 total (M/F) [litters]</b>                                                             | 4 (2/2) [3]                      | 4 (2/2) [3]         | 4 (2/2) [3]                         |                    |
| <b>P14 total (M/F) [litters]</b>                                                             | 4 (2/2) [3]                      | 4 (2/2) [3]         | 4 (2/2) [3]                         |                    |
| <b>P21 total(M/F) [litters]</b>                                                              | 4 (2/2) [3]                      | 4 (2/2) [3]         | 4 (2/2) [3]                         |                    |
| <b>Sample size of pups that underwent in vitro drug incubation and Western Blot analysis</b> |                                  |                     |                                     |                    |
| <b>Pups</b>                                                                                  | <b>0.75mM LM</b>                 | <b>7.5mM LM</b>     | <b>1.7mM HIOC</b>                   |                    |
| <b>P7 total (M/F) [litters]</b>                                                              | 2 (1/1) [1]                      | 2 (1/1) [1]         | 2 (1/1) [1]                         |                    |
| <b>Sample size of pups from TrkB<sup>F616A</sup> litters</b>                                 |                                  |                     |                                     |                    |
| <b>Pups</b>                                                                                  | <b>WT<sup>-/-</sup> + 1NMPP1</b> |                     | <b>F616A<sup>+/+</sup> + 1NMPP1</b> |                    |
| <b>P7 total (M/F) [litters]</b>                                                              | 18 (9/9) [5]                     |                     | 10 (6/4) [5]                        |                    |

1146

1147

1148

1149

1150

1151 **Table S2. Drugs, antibodies, and mice information**

1152

| <b>Antibody</b>                                               | <b>Dilution</b> | <b>Vendor</b>                         | <b>RRID</b> |
|---------------------------------------------------------------|-----------------|---------------------------------------|-------------|
| CD-1 Mouse                                                    | N/A             | Charles River                         | 022         |
| C57 Black <i>TrkB</i> <sup>F616A</sup> Mouse                  | N/A             | Richard Haganir Lab                   | N/A         |
| Phenobarbital (PB)                                            | N/A             | MilliporeSigma<br>P5178-25G           | 57-30-7     |
| LM22A-4                                                       | N/A             | Tocris                                | 4607        |
| HIOC                                                          | N/A             | Tocris                                | 5961        |
| Deoxygedunin (DG)                                             | N/A             | Gaia Chemical Company                 | L4250       |
| 1NMPP1                                                        | N/A             | Apex Bio                              | B1299       |
| mouse $\alpha$ KCC2                                           | 1:1000          | Aviva Systems Biology<br>OASE00240    | AB_2721238  |
| rabbit $\alpha$ pKCC2-S940                                    | 1:1000          | Aviva Systems Biology<br>OAPC00188    | AB_2721198  |
| mouse $\alpha$ TrkB                                           | 1:1000          | BD Biosciences 610102                 | AB_397508   |
| rabbit $\alpha$ pTrkB-Y816                                    | 1:500           | Millipore ABN1381                     | AB_2721199  |
| mouse $\alpha$ PLC $\gamma$ 1                                 | 1:1000          | Thermo Fisher Scientific<br>LF-MA0050 | AB_2163544  |
| rabbit $\alpha$ pPLC $\gamma$ 1-Y783                          | 1:1000          | Cell Signaling Technology<br>2821S    | AB_330855   |
| rabbit $\alpha$ Erk1/2                                        | 1:1000          | Cell Signaling Technology<br>4695     | AB_390779   |
| rabbit $\alpha$ pErk1/2-Thr202/Tyr204                         | 1:1000          | Cell Signaling Technology<br>4377     | AB_331775   |
| mouse $\alpha$ actin                                          | 1:10000         | LI-COR Biosciences<br>926-42213       | AB_2637092  |
| mouse $\alpha$ Transferrin Receptor                           | 1:500           | ThermoFisher Scientific               | AB_2533029  |
| rabbit $\alpha$ Caveolin-1                                    | 1:1000          | Abcam                                 | AB_444314   |
| goat $\alpha$ mouse IgG, IRDye®<br>800CW Conjugated           | 1:5000          | LI-COR Biosciences<br>926-32210       | AB_621842   |
| goat $\alpha$ rabbit IgG Antibody,<br>IRDye® 680LT Conjugated | 1:5000          | LI-COR Biosciences<br>926-68021       | AB_10706309 |

1153
